# Supplementary material
Source: publisher figshare collection journal article supplement (https://diabetesjournals.figshare.com/articles/dataset/_/14938800)
Supplement: Supplementary file 2 [file 1]

## Checklist for Reporting Human Islet Preparations Used in Research

Adapted from Hart NJ, Powers AC (2018) Progress, challenges, and suggestions for using human islets to understand islet biology and human diabetes. *Diabetologia* <https://doi.org/10.1007/s00125-018-4772-2>.

|                                                                                                                                                                                                                 |                                                                 |
|-----------------------------------------------------------------------------------------------------------------------------------------------------------------------------------------------------------------|-----------------------------------------------------------------|
| <b>Manuscript DOI:</b> <a href="https://doi.org/10.2337/db20-1079.R1">https://doi.org/10.2337/db20-1079.R1</a> (Example, <a href="https://doi.org/10.2337/db18-1234">https://doi.org/10.2337/db18-1234</a> )    |                                                                 |
| <b>Title:</b> Inhibition of lncRNA TCONS_00077866 ameliorates the high stearic acid diet-induced mouse pancreatic $\beta$ -cell inflammatory response by increasing miR-297b-5p to downregulate SAA3 expression |                                                                 |
| <b>Author list:</b> Huimin Lu <sup>1</sup> , Rui Guo <sup>1</sup> , Yunjin Zhang, Shenghan Su, Qingrui Zhao, Yue Yu, Hongbo Shi, Haoran Sun, Yongjian Zhang, Shenglong Li, Dan Shi, Xia Chu, and Changhao Sun   |                                                                 |
| <b>Corresponding author:</b> Changhao Sun; Huimin Lu                                                                                                                                                            | <b>Email address:</b> changhaosun2002@163.com; lhm_519@sina.com |

| Islet preparation              | 1     | 2     | 3     | 4     | 5     | 6     | 7     | 8     | 9     | 10    | 11    | 12    | 13   | 14    | 15    | 16   | 17   | 18    | 19   | 20    | 21  | 22   |
|--------------------------------|-------|-------|-------|-------|-------|-------|-------|-------|-------|-------|-------|-------|------|-------|-------|------|------|-------|------|-------|-----|------|
| <b>MANDATORY INFORMATION</b>   |       |       |       |       |       |       |       |       |       |       |       |       |      |       |       |      |      |       |      |       |     |      |
| Unique identifier              | A5    | A6    | A7    | A8    | A9    | A12   | A10   | A11   | A1    | A3    | A4    | A14   | A16  | A18   | A19   | A20  | A23  | A25   | A26  | A15   | A21 | A22  |
| Donor age (years)              | 44    | 45    | 46    | 55    | 66    | 51    | 54    | 55    | 59    | 51    | 53    | 50    | 63   | 55    | 52    | 35   | 64   | 47    | 66   | 54    | 64  | 68   |
| Donor sex (M/F)                | F     | F     | F     | M     | M     | F     | M     | M     | M     | F     | F     | F     | F    | M     | F     | F    | F    | M     | M    | M     | F   | M    |
| Donor BMI (kg/m <sup>2</sup> ) | 22.22 | 22.97 | 23.98 | 22.00 | 22.93 | 21.23 | 24.16 | 28.82 | 24.12 | 24.24 | 24.00 | 26.46 | 18.4 | 24.02 | 24.03 | 20.2 | 25.6 | 19.49 | 20.2 | 27.55 | 25  | 22.2 |



|                                                                             |    |    |    |    |                                                                               |    |    |    |    |    |    |    |    |    |    |    |    |    |    |    |    |                          |         |
|-----------------------------------------------------------------------------|----|----|----|----|-------------------------------------------------------------------------------|----|----|----|----|----|----|----|----|----|----|----|----|----|----|----|----|--------------------------|---------|
| Donor history of diabetes?<br>Yes/No                                        | No | No | No | No | Yes                                                                           | No                       | Yes     |
| <b>If Yes, complete the next two lines if this information is available</b> |    |    |    |    |                                                                               |    |    |    |    |    |    |    |    |    |    |    |    |    |    |    |    |                          |         |
| Diabetes duration (years)                                                   |    |    |    |    | 30                                                                            |    |    |    |    |    |    |    |    |    |    |    |    |    |    |    |    |                          | 1 month |
| Glucose-lowering therapy at time of death <sup>c</sup>                      |    |    |    |    | Injection of insulin, oral administration of Empagliflozin Tablets (No death) |    |    |    |    |    |    |    |    |    |    |    |    |    |    |    |    | Nutritional diet control |         |

**RECOMMENDED INFORMATION**

| Donor cause of death                                     | no death | no death | no death | no death | no death | no death | no death | no death | no death | no death | no death | no death | no death                                  | no death                                  | no death                                  | no death                                  | no death                                  | no death                                  | no death | no death | no death | no death |  |
|----------------------------------------------------------|----------|----------|----------|----------|----------|----------|----------|----------|----------|----------|----------|----------|-------------------------------------------|-------------------------------------------|-------------------------------------------|-------------------------------------------|-------------------------------------------|-------------------------------------------|----------|----------|----------|----------|--|
| Warm ischaemia time (h)                                  |          |          |          |          |          |          |          |          |          |          |          |          |                                           |                                           |                                           |                                           |                                           |                                           |          |          |          |          |  |
| Cold ischaemia time (h)                                  |          |          |          |          |          |          |          |          |          |          |          |          |                                           |                                           |                                           |                                           |                                           |                                           |          |          |          |          |  |
| Estimated purity (%)                                     | >90      | >90      | >90      | >90      | >90      | >90      | >90      | >90      | >90      | >90      | >90      | >90      | >90                                       | >90                                       | >90                                       | >90                                       | >90                                       | >90                                       | >90      | >90      | >90      | >90      |  |
| Estimated viability (%)                                  | >80      | >80      | >80      | >80      | >80      | >80      | >80      | >80      | >80      | >80      | >80      | >80      | >80                                       | >80                                       | >80                                       | >80                                       | >80                                       | >80                                       | >80      | >80      | >80      | >80      |  |
| Total culture time (h) <sup>d</sup>                      |          |          |          |          |          |          |          |          |          |          |          |          |                                           |                                           |                                           |                                           |                                           |                                           |          |          |          |          |  |
| Glucose-stimulated insulin secretion or other functional | PCR      | PCR, Glucose-stimulated insulin secretion | PCR      | PCR      | PCR      | PCR      |  |

|                                        |    |    |    |    |    |    |    |    |    |    |    |    |                           |    |                           |    |                           |    |    |    |    |    |
|----------------------------------------|----|----|----|----|----|----|----|----|----|----|----|----|---------------------------|----|---------------------------|----|---------------------------|----|----|----|----|----|
| measur<br>ement <sup>e</sup>           |    |    |    |    |    |    |    |    |    |    |    |    | ulin<br>sec<br>reti<br>on |    | ulin<br>sec<br>reti<br>on |    | ulin<br>sec<br>reti<br>on |    |    |    |    |    |
| Handpic<br>ked to<br>purity?<br>Yes/No | No                        | No | No                        | No | No                        | No | No | No | No | No |
| Additi<br>onal notes                   |    |    |    |    |    |    |    |    |    |    |    |    |                           |    |                           |    |                           |    |    |    |    |    |

<sup>a</sup>If you have used more than eight islet preparations, please complete additional forms as necessary

<sup>b</sup>For example, IIDP, ECIT, Alberta IsletCore

<sup>c</sup>Please specify the therapy/therapies

<sup>d</sup>Time of islet culture at the isolation centre, during shipment and at the receiving laboratory

<sup>e</sup>Please specify the test and the results
