# Supplementary material
Source: publisher figshare collection journal article supplement (https://diabetesjournals.figshare.com/articles/dataset/_/14938800)
Supplement: Supplementary file 3 [file 2]

## SUPPLEMENTARY DATA

### Supplementary Figures

#### Supplementary Figure S1-The map of pHBAAV-U6-MCS-CMV-EGFP vector

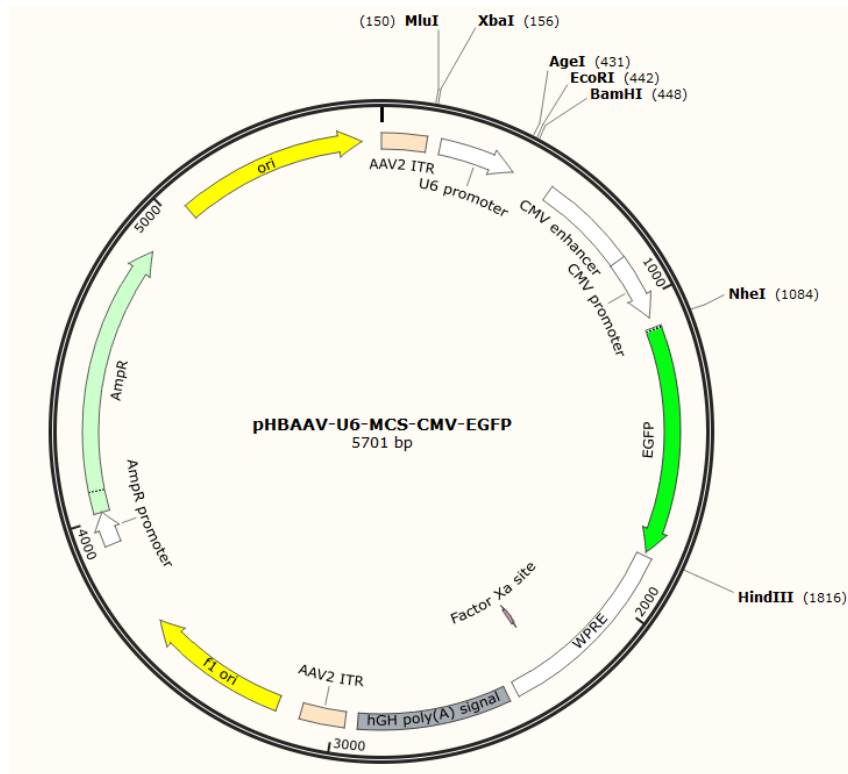

Islets                      **B**                      **Skeletal muscle**                      **C**                      **Perirenal adipose**

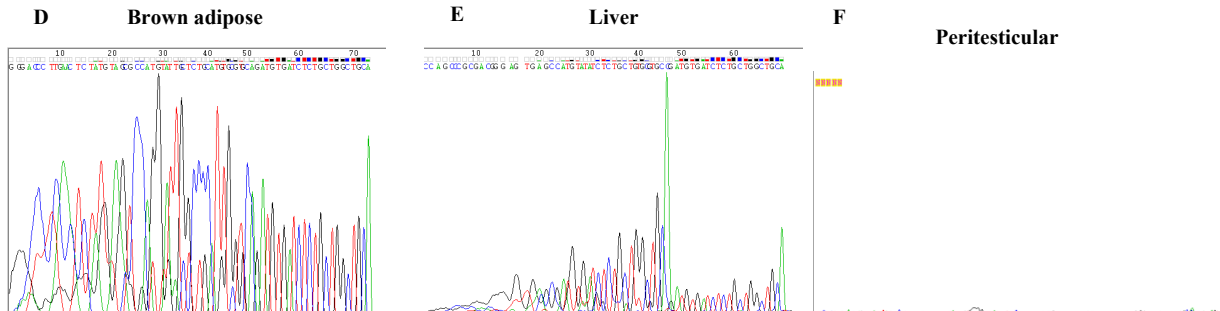

**Supplementary Figure S3-Identification of human homologous sequences of Inc866.** (A) Searching for human homologous sequences using NCBI-BLAST. (B) Upper panel, Sanger sequencing results of qPCR product of human islets; lower panel, sequence alignment of qPCR products with full length of AL137118.20.

**A**

| Description                                                                                                                                  | Scientific Name | Max Score | Total Score | Query Cover | E value | Per. Ident | Acc. Len | Accession                   |
|----------------------------------------------------------------------------------------------------------------------------------------------|-----------------|-----------|-------------|-------------|---------|------------|----------|-----------------------------|
| <input checked="" type="checkbox"/> Human DNA sequence from clone RP11-108P5 on chromosome 13q14.12-21.1 com... <a href="#">Homo sapiens</a> |                 | 141       | 263         | 39%         | 7e-28   | 65.32%     | 162446   | <a href="#">AL137118.20</a> |

**Human DNA sequence from clone RP11-108P5 on chromosome 13q14.12-21.1, complete sequence**

Sequence ID: [AL137118.20](#) Length: 162446 Number of Matches: 3

Range 1: 143638 to 144449 [GenBank](#) [Graphics](#)

[▼ Next Match](#) [▲ Previous Match](#)

| Score         | Expect                                                         | Identities   | Gaps       | Strand     |
|---------------|----------------------------------------------------------------|--------------|------------|------------|
| 141 bits(155) | 7e-28                                                          | 550/842(65%) | 51/842(6%) | Plus/Minus |
| Query 2152    | ATCAAGTCTTTGCTTTCTTTGGGACAGCAACTATCCCTATTTTAA-CTACTTTTGAAGT    | 2210         |            |            |
| Sbjct 144449  | ATCGAGCATTGCTTTCTTTGGTCAAGCAGCTGTTC-TCTTGCAGACCCTCCTGTGGT      | 144391       |            |            |
| Query 2211    | TTCTTGAACCATGATCAAATAA---TTTATTTCCCTCAGTGTCTATGTTTGGATAATATTT  | 2267         |            |            |
| Sbjct 144390  | CCCCCTAACCATGATCAAATCACCATTCAATTCTCCCA-TGTCTTATTTAGATAAGATT    | 144332       |            |            |
| Query 2268    | TCCTGTAGAAATCGTCTGTAAAGACATTAATAGCACTAGTTTGAAGAAGTAGCATTCTTAC  | 2327         |            |            |
| Sbjct 144331  | GCTTC-AGAAATGAATTGCCAAGACATTCACAATGTTTCATTTGGGAAGTGGCATTCTTC   | 144273       |            |            |
| Query 2328    | ACAATAACCTTTGAAAGGGTTGAGAAT---ATACTCAC-AGAAAAAACAGGATATGC      | 2382         |            |            |
| Sbjct 144272  | ACAGTGACTTCCCCAAGACTTGAGAAAGCCCATATGGAGTAGGAAAGACTCTGGATACAC   | 144213       |            |            |
| Query 2383    | CTGCCCCAGTTTACTCCTCCTCCTCCAAACATCATTGAGTCTTTCTCGGCTGCTTTA      | 2442         |            |            |
| Sbjct 144212  | CAGATCCAGCTCATTCTTTTACTC--AACAAAAT-CACAGCTTTTCTTACTGCCTCA      | 144156       |            |            |
| Query 2443    | TTCCAATCACCAGCTGAAGACAGTTCTAGCTCTGGTGCCCTTT---CCTCCAATATGA     | 2498         |            |            |
| Sbjct 144155  | TTCCAAAAGCCAGCTGTGGAATGTTCTGGCTGCTGTGCCCATTTCTTCTCTAATATTA     | 144096       |            |            |
| Query 2499    | GTCATGAATCTTCTCCAGTAATTTTCAGCCGTAGGTGTATCTGATA-ACATGAGGTATCT   | 2557         |            |            |
| Sbjct 144095  | GTTCTGAATTCTCTCGAGTAGGCTCAAGTAATAGGTATAGTAAATTTATTTCAATAACT    | 144036       |            |            |
| Query 2558    | CCCTTTTGAATGAGTATGTTGTTGTTGTTGTTGTTGTTGTTGTTGTTGTTGTTGTTGTT    | 2616         |            |            |
| Sbjct 144035  | TTCCATTAAATTTGTAATGTATGCTTATGGAGATCAATGTTCTATTGCGTGCTATTTTA    | 143976       |            |            |
| Query 2617    | TGATGATTTTGGTCTTGGACTTTGCTTGTGAGTTTCTGAATTGGGTCTGAGTAATGTCT    | 2676         |            |            |
| Sbjct 143975  | TACT--TTTGTGCTTGGAGTCTGCTCCATCTATT-TGAATGAGGTTTGGATAGATGTTT    | 143919       |            |            |
| Query 2677    | GCCTTTGTGCTTTTAAATACATGCCCAAACTCGGGGGAAAAAAGAAAAACCCTGACAC     | 2736         |            |            |
| Sbjct 143918  | GCCTTGGTGTCTTAAATATATTCCTTAAGCCTGA---ACAAAAG-----CCTGACA-      | 143870       |            |            |
| Query 2737    | AGTAATCATGGGC--TCATCATCTCTTCTCATCAGGAACAGCTTTGCACAGTAATAAAG    | 2794         |            |            |
| Sbjct 143869  | --TGACCAATGCCCACTCATCATTTTCTTCTCTTCAGGAATTGTTTGTGCAATAATAAAA   | 143812       |            |            |
| Query 2795    | TTCTGTTGCTT--TAGTCATTTGCTTGTGTGTCAGAGCCAAAAACGTATTGGACTGGA     | 2852         |            |            |
| Sbjct 143811  | TGCTATTGCTTCTTAGTGATTTGTATGTGGCAAAAGAGCCAAAAATATATCTG-CTGGA    | 143753       |            |            |
| Query 2853    | GGAAGAGCTTGTGCTTAGAAAACAAAAGT-CACTCCTTCCAAACCTAATAAACTCTG      | 2911         |            |            |
| Sbjct 143752  | T-----CTTGTGCTTAAAAACAAAATCCGTTTCTTTTCTTCTGAGTATGATATAA-TTTG   | 143700       |            |            |
| Query 2912    | GC-TGTTGTAGTCTTTCATGGGTGTTACACTTTTCTGTTTCTTCTTCTTCTTCTTCTTCT   | 2970         |            |            |
| Sbjct 143699  | ACTTGTCTTATTCTTTCATGGATATTACATTTTCTTCTTCTTCTTCTTCTTCTTCTTCTTCT | 143640       |            |            |
| Query 2971    | GT 2972                                                        |              |            |            |
| Sbjct 143639  | GT 143638                                                      |              |            |            |

Range 2: 146533 to 146662 [GenBank](#) [Graphics](#) [▼ Next Match](#) [▲ Previous Match](#) [▲ First Match](#)

| Score         | Expect                                                        | Identities  | Gaps      | Strand     |
|---------------|---------------------------------------------------------------|-------------|-----------|------------|
| 63.5 bits(69) | 2e-04                                                         | 93/130(72%) | 4/130(3%) | Plus/Minus |
| Query 373     | TATCGTTGCTGTGGTTGTTATTCTGCAAGTGAGATAATTAAGGTTTAGAAGAGTCTAAAG  | 432         |           |            |
| Sbjct 146662  | TATCATTTGTTGTGGTTGTTATTTTACGAATGAGAGAATTCAGCTTTGGGCTGGTCTAACA | 146603      |           |            |
| Query 433     | TCATTTAACTGACAAGGGACAGGACTGGAATTCTAACCAAG--CTACCTGACATCGGCA-  | 489         |           |            |
| Sbjct 146602  | ACACTTAGCTACTAAGTGGCAGAACTAGAATTGTAGCCCAGGCCTGTCTGACATCAGTAA  | 146543      |           |            |
| Query 490     | -TGTTCTTGA 498                                                |             |           |            |
| Sbjct 146542  | CTGTTCTTGA 146533                                             |             |           |            |

Range 3: 145118 to 145375 [GenBank](#) [Graphics](#) [▼ Next Match](#) [▲ Previous Match](#) [▲ First Match](#)

| Score         | Expect                                                          | Identities   | Gaps       | Strand     |
|---------------|-----------------------------------------------------------------|--------------|------------|------------|
| 59.0 bits(64) | 0.002                                                           | 178/269(66%) | 26/269(9%) | Plus/Minus |
| Query 1530    | TGATCATTTCTGTACTCTCTGCAAAGTACCAGCCTAACTGTCCAACCTCCTCCGGAACCT    | 1589         |            |            |
| Sbjct 145375  | TGATCATTTTTGTTCTTCTGTTCATTACCAGCCTAACAGGGTCACTTCACCTGGGCCCT     | 145316       |            |            |
| Query 1590    | GAGGG-CACCTTTAACTTCTTTTGTTAGCCTTGCCAGCATTTCGCCCTTTGATTTCAGGTTGA | 1648         |            |            |
| Sbjct 145315  | TGGAGACACTTTGGACATTTCTGTTAGACTTTTCAGACCTAACCCCTTGGTTTCAGGTTGA   | 145256       |            |            |
| Query 1649    | AATAGTTAACCTAGA-----ATTGGATCTCAGCCTGGTGAGAACTTCCTCTGAAGTTCATG   | 1704         |            |            |
| Sbjct 145255  | AATGATTGTTCCAGAGCTTCCTGAATCTCAGCCTGTTG----TTTCTTCAGTA-TTC-TG    | 145202       |            |            |
| Query 1705    | TTATGTCTTTTAACCAAATC-CCCCT-----TGTATCTCCTCAAAGAGAAATTCCTC       | 1754         |            |            |
| Sbjct 145201  | TTGTGCCTCTTAATCAAGTCTCCACTCCCAGGCTCTTCTCTCCTC--AGAAAAATTCCTC    | 145144       |            |            |
| Query 1755    | CTTCAATGGTCGTGGCATTCCTTCCTTTA 1783                              |              |            |            |
| Sbjct 145143  | CCTCA---GTGATTGCATGCCTTTCTTTA 145118                            |              |            |            |

B

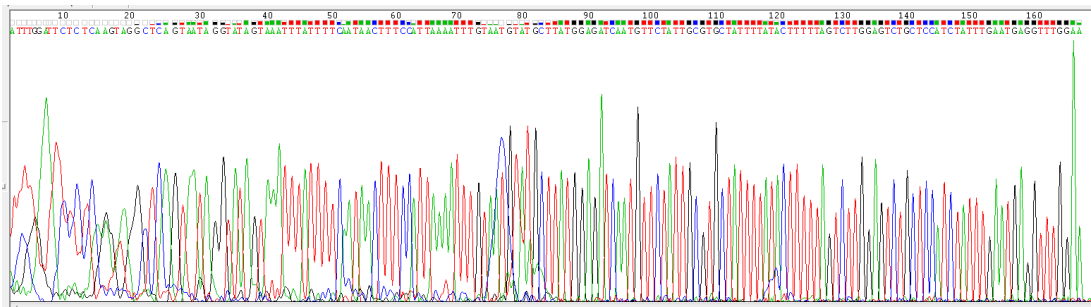

[Download](#) [GenBank](#) [Graphics](#)  
Human DNA sequence from clone RP11-108P5 on chromosome 13q14.12-21.1, complete sequence  
Sequence ID: [AL137118.20](#) Length: 162446 Number of Matches: 1

Range 1: 143963 to 144121 [GenBank](#) [Graphics](#) [▼ Next Match](#) [▲ Previous Match](#)

| Score         | Expect                                                       | Identities   | Gaps      | Strand    |
|---------------|--------------------------------------------------------------|--------------|-----------|-----------|
| 279 bits(309) | 5e-71                                                        | 158/159(99%) | 1/159(0%) | Plus/Plus |
| Query 10      | AGACTAAAA-CTATAAAATAGCAAGCAATAGAACATTGATCTCCATAAGCATACATTACA | 68           |           |           |
| Sbjct 143963  | AGACTAAAAAGTATAAAATAGCAAGCAATAGAACATTGATCTCCATAAGCATACATTACA | 144022       |           |           |
| Query 69      | AATTTTAATGCAAGTTATTGAAAAATAATTTACTATACTATTACTTGAGCCTACTCGA   | 128          |           |           |
| Sbjct 144023  | AATTTTAATGCAAGTTATTGAAAAATAATTTACTATACTATTACTTGAGCCTACTCGA   | 144082       |           |           |
| Query 129     | GAGAAATTCAGAACTAATATTAGAGGAACAAATGGGCACA 167                 |              |           |           |
| Sbjct 144083  | GAGAAATTCAGAACTAATATTAGAGGAACAAATGGGCACA 144121              |              |           |           |

**Supplementary Figure S4-Confocal image of GFP investigation in pancreas sections after injection of sh866-V or shNC-V into mice via an intraductal route.**

Quantification of the GFP signals was performed using NIH Image J 1.52 software.

Graph representing the number of pancreas with GFP expression in whole area.

Scale bar: 200  $\mu$ m. **shNC-V**, the negative control shRNA engineered into the AAV9 vector; **sh866-V**, AAV9 vector carrying shRNA-lnc866. Representative image of 3 independent experiments.

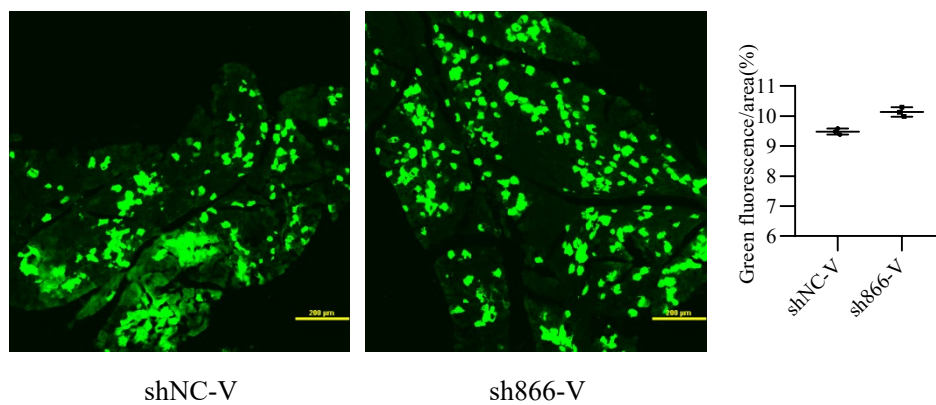

**Supplementary Figure S5-Effect of AL137118.20 Smart Silencer on stearic acid-impaired GSIS.** \* $P<0.05$ , \*\* $P<0.01$  versus the ss-NC group; ^ $P<0.05$ , ^^ $P<0.01$  versus the SA+ss-AL group. SA, stearic acid; ss-AL, Smart Silencer for AL137118.20; ss-NC, negative control of ss-AL.  $n = 5$  samples from normolipidemic individuals.

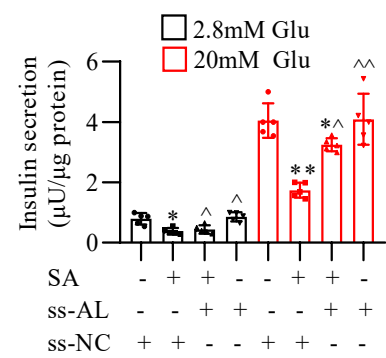

**Supplementary Figure S6-Inhibitory efficiency of Smart Silencer for AL137118.20 in the absence and presence of stearic acid.** \* $P<0.05$ , \*\* $P<0.01$  *versus* the ss-NC group; ^ $P<0.05$ , ^^ $P<0.01$  *versus* the SA+ss-AL group. **SA**, stearic acid; **ss-AL**, Smart Silencer for AL137118.20; **ss-NC**, negative control of ss-AL.  $n = 5$  samples from normolipidemic individuals.

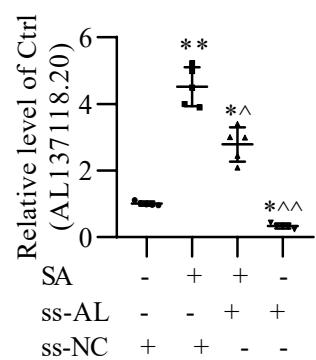

**Supplementary Figure S7-The co-expression network of lnc866, miR-297b-5p, and relevant mRNAs.** Yellow circle: lnc866; pink circle: miR-297b-5p; green circle: mRNAs; black line: negative relationship.

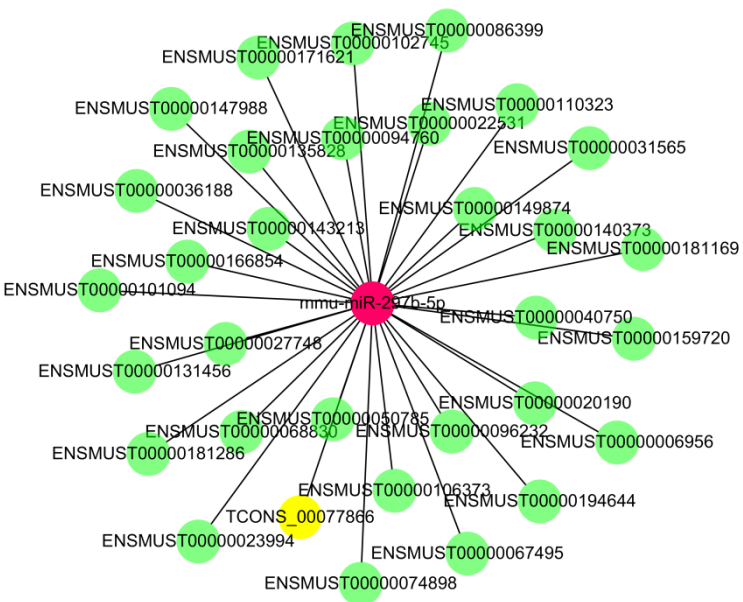



**Supplementary Figure S8-Inhibitory effect of Smart Silencer for lnc866 on miR-297b-5p expression in  $\beta$ -TC6 cell.** \* $P < 0.05$  versus the ss-NC group. **ss-866**, Smart Silencer for lnc866; **ss-NC**, the negative control of Smart Silencer.  $n = 3$  independent cell cultures per group.

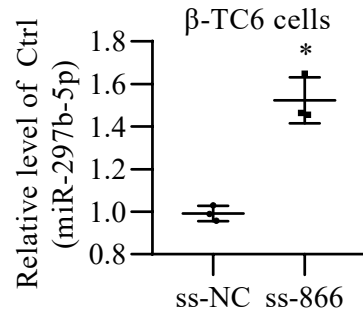

**Supplementary Figure S9-Change in the expression of hsa-miR-297 after knockdown of AL137118.20 in the presence of stearic acid.** \* $P<0.05$ , \*\* $P<0.01$  *versus* the ss-NC group; ^ $P<0.05$ , ^^ $P<0.01$  *versus* the SA+ss-AL group. **SA**, stearic acid; **ss-AL**, Smart Silencer for AL137118.20; **ss-NC**, negative control of ss-AL.  $n = 5$  samples from normolipidemic individuals.

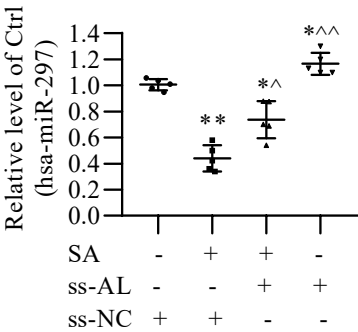

**Supplementary Figure S10-Effect of AMO-297 on GSIS and inflammatory factors level in  $\beta$ -TC6 cells without stearic acid treatment.** (A) miR-297b-5p expression after the transfection of miR-297b-5p mimic or AMO-297b-5p in  $\beta$ -TC6 cells. (B) Insulin concentration after the transfection of a miR-297b-5p mimic or AMO-297b-5p in  $\beta$ -TC6 cells. (C) Western blots showing the protein expression of NF  $\kappa$ B p65, IL6, and TNF- $\alpha$  following the transfection of a miR-297b-5p mimic or AMO-297b-5p in  $\beta$ -TC6 cells. \* $P$ <0.05, \*\* $P$ <0.01 *versus* the AMO-NC group; ^ $P$ <0.05, ^^ $P$ <0.01 *versus* the stearic acid AMO-297 group. **AMO-297**, anti-miR-297b-5p oligonucleotides; **AMO-NC**, negative control of AMO-297; **297mimic**, miR-297b-5p mimics.  $n$  = 3 independent cell cultures per group.

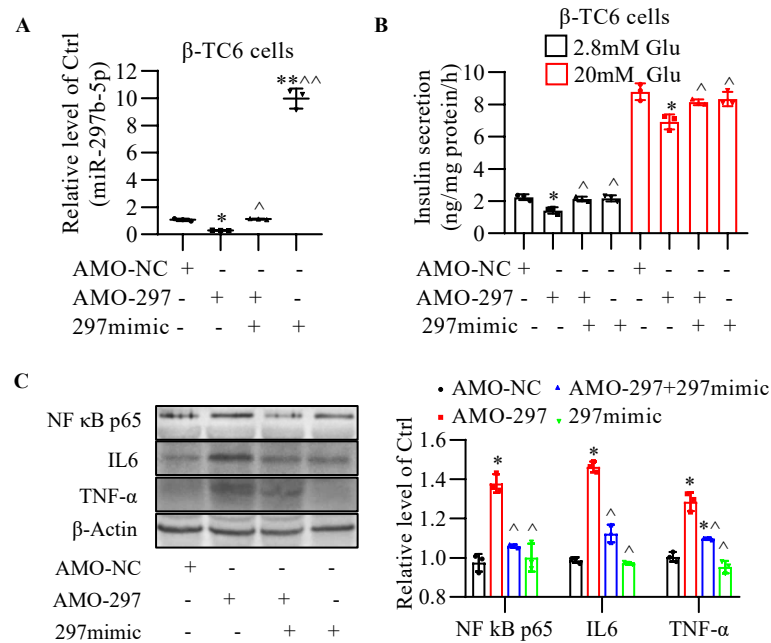

**Supplementary Figure S11-Role of miR-297b-5p in stearic acid treated mouse islets.** (A) Protection of the stearic acid–impaired glucose-stimulated insulin secretion (GSIS) after the transfection of a miR-297b-5p mimic. (B) Western blot showing the effects of miR-297b-5p on the expressions of NF  $\kappa$ B p65, IL6, TNF- $\alpha$  and SAA3 following stearic acid treatment. \* $P$ <0.05, \*\* $P$ <0.01 *versus* the 297NC group; ^ $P$ <0.05, ^^ $P$ <0.01 *versus* the SA+297NC group. SA, stearic acid; **297NC**, negative control of miR-297b-5p; **297mimic**, miR-297b-5p mimics.  $n$  = 3 independent cell cultures per group.

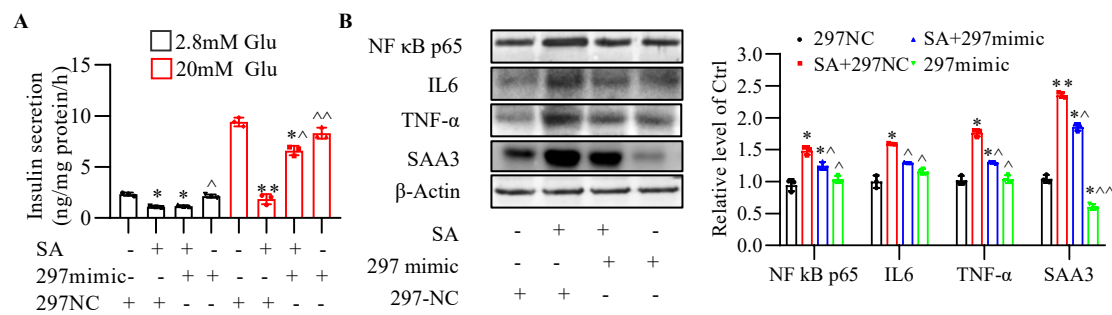

**Supplementary Figure S12-Changes in expressions of hsa-miR-297 and *SAA1* in islets from patients with hyperlipidemia.** \* $P < 0.05$ , \*\* $P < 0.01$  versus the N groups. N, normal lipidemic participants; H, hyperlipidemic patients. n=13 and 9 samples in N and H group, respectively.

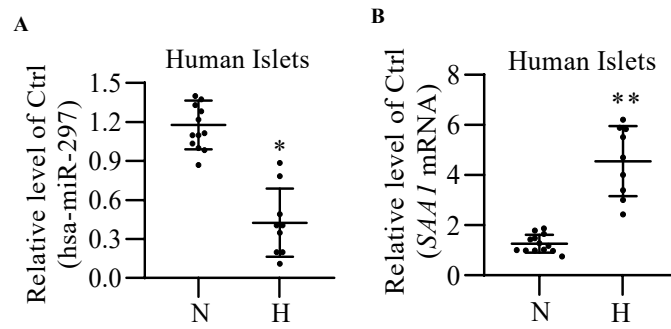

**Supplementary Figure S13-Involvement of SAA3 in stearic acid treated mouse islets.** (A) Restoration of the stearic acid–impaired glucose-stimulated insulin secretion (GSIS) after the knocking down of *Saa3*. (B) Effects of si-*Saa3* on NF κB p65, IL6, TNF-α and SAA3 protein expression in the presence of stearic acid. SA, stearic acid; si-*Saa3*, siRNA for *Saa3*; si-NC, negative control of si-*Saa3*. \**P*<0.05, \*\**P*<0.01 versus the si-NC group; ^*P*<0.05, ^^*P*<0.01 versus the SA+si-*Saa3* group. *n* = 3 independent cell cultures per group.

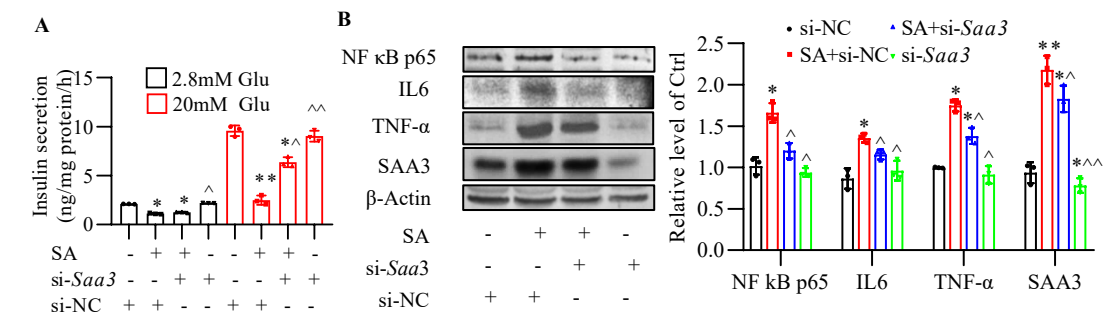

**Supplementary Figure S14-Sequence alignment of human *SAA1* in islets with mouse *Saa3*.** (A) Sanger sequencing results of *SAA1* in human islets. (B) Upper panel, searching for the mouse homologous sequence of qPCR product of human *SAA1* in islets; lower panel, sequence alignment of qPCR product of human *SAA1* in islets with mouse *Saa3*.

**A**

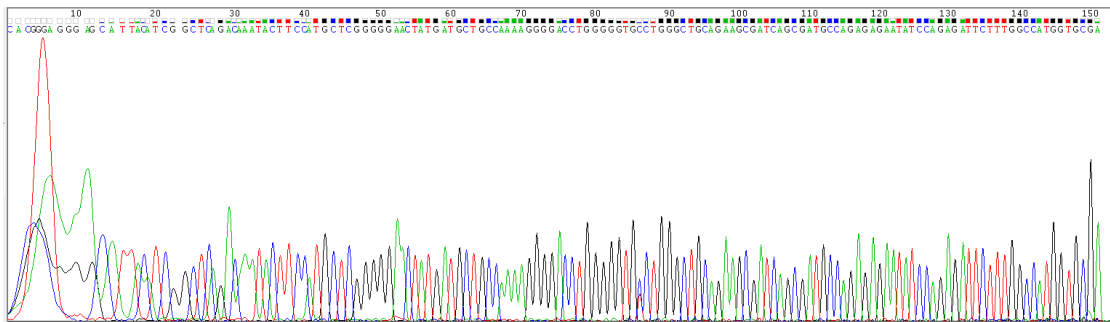

**B**

| Sequences producing significant alignments                           |                                                                              |                              |           |             |             |         |            |           |                                | Download                | New                      | Select columns                           | Show                                           | 100 |  |
|----------------------------------------------------------------------|------------------------------------------------------------------------------|------------------------------|-----------|-------------|-------------|---------|------------|-----------|--------------------------------|-------------------------|--------------------------|------------------------------------------|------------------------------------------------|-----|--|
| <input checked="" type="checkbox"/> select all 10 sequences selected |                                                                              |                              |           |             |             |         |            |           |                                | <a href="#">GenBank</a> | <a href="#">Graphics</a> | <a href="#">Distance tree of results</a> | <a href="#">New</a> <a href="#">MSA Viewer</a> |     |  |
|                                                                      | Description                                                                  | Scientific Name              | Max Score | Total Score | Query Cover | E value | Per. Ident | Acc. Len  | Accession                      |                         |                          |                                          |                                                |     |  |
| Transcripts                                                          |                                                                              |                              |           |             |             |         |            |           |                                |                         |                          |                                          |                                                |     |  |
| <input checked="" type="checkbox"/>                                  | Mus musculus serum amyloid A 3 (Saa3) mRNA                                   | <a href="#">Mus musculus</a> | 133       | 133         | 83%         | 4e-29   | 83.33%     | 531       | <a href="#">NM_011315.3</a>    |                         |                          |                                          |                                                |     |  |
| <input checked="" type="checkbox"/>                                  | Mus musculus serum amyloid A 2 (Saa2) transcript variant 4, mRNA             | <a href="#">Mus musculus</a> | 123       | 123         | 76%         | 7e-26   | 83.48%     | 822       | <a href="#">NM_001379269.1</a> |                         |                          |                                          |                                                |     |  |
| <input checked="" type="checkbox"/>                                  | Mus musculus serum amyloid A 2 (Saa2) transcript variant 1, mRNA             | <a href="#">Mus musculus</a> | 123       | 123         | 76%         | 7e-26   | 83.48%     | 609       | <a href="#">NM_011314.3</a>    |                         |                          |                                          |                                                |     |  |
| <input checked="" type="checkbox"/>                                  | Mus musculus serum amyloid A 2 (Saa2) transcript variant 2, mRNA             | <a href="#">Mus musculus</a> | 123       | 123         | 76%         | 7e-26   | 83.48%     | 606       | <a href="#">NM_001357491.2</a> |                         |                          |                                          |                                                |     |  |
| <input checked="" type="checkbox"/>                                  | Mus musculus serum amyloid A 2 (Saa2) transcript variant 3, mRNA             | <a href="#">Mus musculus</a> | 123       | 123         | 76%         | 7e-26   | 83.48%     | 825       | <a href="#">NM_001379268.1</a> |                         |                          |                                          |                                                |     |  |
| <input checked="" type="checkbox"/>                                  | PREDICTED: Mus musculus serum amyloid A 1 (Saa1) transcript variant X2, mRNA | <a href="#">Mus musculus</a> | 114       | 114         | 78%         | 1e-23   | 81.36%     | 1026      | <a href="#">XM_006540725.2</a> |                         |                          |                                          |                                                |     |  |
| <input checked="" type="checkbox"/>                                  | PREDICTED: Mus musculus serum amyloid A 1 (Saa1) transcript variant X1, mRNA | <a href="#">Mus musculus</a> | 114       | 114         | 78%         | 1e-23   | 81.36%     | 1029      | <a href="#">XM_006540724.2</a> |                         |                          |                                          |                                                |     |  |
| <input checked="" type="checkbox"/>                                  | Mus musculus serum amyloid A 1 (Saa1) transcript variant 1, mRNA             | <a href="#">Mus musculus</a> | 114       | 114         | 78%         | 1e-23   | 81.36%     | 609       | <a href="#">NM_009117.4</a>    |                         |                          |                                          |                                                |     |  |
| <input checked="" type="checkbox"/>                                  | Mus musculus serum amyloid A 1 (Saa1) transcript variant 2, mRNA             | <a href="#">Mus musculus</a> | 114       | 114         | 78%         | 1e-23   | 81.36%     | 612       | <a href="#">NM_001357493.1</a> |                         |                          |                                          |                                                |     |  |
| <input checked="" type="checkbox"/>                                  | Mus musculus strain C57BL/6J chromosome 7_GRCm39                             | <a href="#">Mus musculus</a> | 107       | 410         | 55%         | 1e-21   | 88.10%     | 144995196 | <a href="#">NC_000073.7</a>    |                         |                          |                                          |                                                |     |  |

[Download](#) [GenBank](#) [Graphics](#)

Mus musculus serum amyloid A 3 (Saa3) mRNA.

Sequence ID: [NM\\_011315.3](#) Length: 531 Number of Matches: 1

Range 1: 181 to 306 [GenBank](#) [Graphics](#) [Next Match](#)

| Score         | Expect                                                        | Identities   | Gaps      | Strand    |
|---------------|---------------------------------------------------------------|--------------|-----------|-----------|
| 133 bits(147) | 4e-29                                                         | 105/126(83%) | 0/126(0%) | Plus/Plus |
| Query 24      | CTCAGACAAATACTTCCATGCTCGGGGGAACATATGATGCTGCCAAAAGGGGACCTGGGGG | 83           |           |           |
| Sbjct 181     | CTCAGACAAATACTTCCATGCTCGGGGGAACATATGATGCTGCCCGGAGGGGTCCCGGGGG | 240          |           |           |
| Query 84      | TGCCTGGGCTGCAGAAGCGATCAGCGATGCCAGAGAGAATATCCAGAGATTCTTTGGCCA  | 143          |           |           |
| Sbjct 241     | AGCCTGGGCTGCTAAAGTCATCAGCGATGCCAGAGAGGCTGTTCAGAAATTACGGGACA   | 300          |           |           |
| Query 144     | TGGTGC 149                                                    |              |           |           |
| Sbjct 301     | TGGAGC 306                                                    |              |           |           |

## Supplementary Tables

**Supplementary Table S1** The details of sh866-V and shNC-V

| name           | sequence                                                                                                                                                                                                                                                                                                                                                                                                                                                                                                                                                                                                                                                                              |
|----------------|---------------------------------------------------------------------------------------------------------------------------------------------------------------------------------------------------------------------------------------------------------------------------------------------------------------------------------------------------------------------------------------------------------------------------------------------------------------------------------------------------------------------------------------------------------------------------------------------------------------------------------------------------------------------------------------|
| Promoter of U6 | GAGGGCCTATTTCCCATGATTCCTTCATATTTGCA<br>TATACGATACAAGGCTGTTAGAGAGATAATTGGA<br>ATTAATTTGACTGTAAACACAAAGATATTAGTAC<br>AAAATACGTGACGTAGAAAGTAATAATTTCTTGG<br>GTAGTTTGCAGTTTTTAAAATTATGTTTTTAAAATG<br>GACTATCATATGCTTACCGTAACTTGAAAGTATTT<br>CGATTTCTTGGCTTTATATATCTTGTGGAAAGGA<br>C                                                                                                                                                                                                                                                                                                                                                                                                       |
| EGFP           | ATGGTGAGCAAGGGCGAGGAGCTGTTCACCGG<br>GGTGGTGCCCATCCTGGTTCGAGCTGGACGGCGA<br>CGTAAACGGCCACAAGTTCAGCGTGTCCGGCGA<br>GGGCGAGGGCGATGCCACCTACGGCAAGCTGA<br>CCCTGAAGTTCATCTGCACCACCGGCAAGCTGC<br>CCGTGCCCTGGCCCACCCTCGTGACCACCCTGA<br>CCTACGGCGTGCAGTGCTTCAGCCGCTACCCCG<br>ACCACATGAAGCAGCACGACTTCTTCAAGTCCG<br>CCATGCCCCGAAGGCTACGTCCAGGAGCGCACCA<br>TCTTCTTCAAGGACGACGGCAACTACAAGACCC<br>GCGCCGAGGTGAAGTTCGAGGGCGACACCCTG<br>GTGAACCGCATCGAGCTGAAGGGCATCGACTTC<br>AAGGAGGACGGCAACATCCTGGGGCACAAGCT<br>GGAGTACAACACTACAACAGCCACAACGTCTATAT<br>CATGGCCGACAAGCAGAAGAACGGCATCAAGG<br>TGAAGTTCAAGATCCGCCACAACATCGAGGACG<br>GCAGCGTGCAGCTCGCCGACCACTACCAGCAGA<br>ACACCCCCATCGGCGACGGCCCCGTGCTGCTGC |



|                         |                                   |
|-------------------------|-----------------------------------|
|                         | CCGACAACCACTACCTGAGCACCCAGTCCGCCC |
|                         | TGAGCAAAGACCCCAACGAGAAGCGCGATCAC  |
|                         | ATGGTCCTTAAGGAGTTCGTGACCGCCGCCGGG |
|                         | ATCACTCTCGGCATGGACGAGCTGTACAAGTAA |
| siRNA for shNC-V        | TTCTCCGAACGTGTCACGTAA             |
| shRNA for shNC-V        | Top strand:                       |
|                         | GATCCGTTCTCCGAACGTGTCACGTAATTCAAG |
|                         | AGATTACGTGACACGTTTCGGAGAATTTTTTC  |
|                         | Bottom strand:                    |
|                         | AATTGAAAAAATTCTCCGAACGTGTCACGTAAT |
|                         | CTCTTGAATTACGTGACACGTTTCGGAGAACG  |
| siRNA for sh866-V       | CAGCCTGGTGAGAACTTCCTCTGAA         |
| shRNA for sh866-V       | Top strand:                       |
|                         | AATTCGCAGCCTGGTGAGAACTTCCTCTGAATT |
|                         | CAAGAGATTCAGAGGAAGTTCTCACCAGGCTGT |
|                         | TTTTTG                            |
|                         | Bottom strand:                    |
|                         | GATCCAAAAAACAGCCTGGTGAGAACTTCCTCT |
|                         | GAATCTCTTGAATTCAGAGGAAGTTCTCACCAG |
|                         | GCTGCG                            |
| viral titer for sh866-V | 1.2*10 <sup>12</sup> µg/mL        |
| viral titer for shNC-V  | 3.5*10 <sup>12</sup> µg/mL        |

---

**shNC-V**, the negative control shRNA engineered into the AAV9 vector; **sh866-V**, AAV9 vector carrying shRNA-lnc866; **EGFP**, enhanced green fluorescent protein; **AAV9**, Adeno-Associated Virus serotype 9.

**Supplementary Table S2** The composition of the diet for mice

| Ingredients                       | Low fat diet | High SA diet |
|-----------------------------------|--------------|--------------|
| Cornstarch (g/kg)                 | 367.5        | 40           |
| Casein (g/kg)                     | 213.465      | 258.45       |
| Dextrinized cornstarch (g/kg)     | 121.53       | 121.53       |
| Sucrose (g/kg)                    | 88.91        | 88.91        |
| Lard (g/kg)                       | 0            | 316.6        |
| Soybean oil (g/kg)                | 51           | 32.31        |
| Fiber (g/kg)                      | 40           | 64.61        |
| Mineral mix (AIN-93G-MX) (g/kg)   | 12.92        | 12.92        |
| Vitamin mix (AIN-93G-VX) (g/kg)   | 12.92        | 12.92        |
| L-cystine (g/kg)                  | 3.88         | 3.88         |
| Choline bitartrate (g/kg)         | 2.58         | 2.58         |
| Calcium carbonate (g/kg)          | 16.8         | 16.8         |
| Calcium hydrogen phosphate (g/kg) | 7.11         | 7.11         |
| Potassium citrate(g/kg)           | 21.32        | 21.32        |
| Edible blue dye (g/kg)            | 0.065        | 0.065        |
| Energy (kcal/kg)                  | 3851.82      | 5242.95      |

**SA:** stearic acid

**Supplementary Table S3** Target sequences of Smart Silencer for mouse Inc866

| Gene                                         | sequences            |
|----------------------------------------------|----------------------|
| siRNA-1 target sequence                      | CTGCAAGTGAGATAATTAA  |
| siRNA-2 target sequence                      | GCATTCCTTCCTTTAAACA  |
| siRNA-3 target sequence                      | GAGAATATACTCACAGAAA  |
| antisense oligonucleotides target sequence-1 | ACGGCTTCCAGATCTGTCTT |
| antisense oligonucleotides target sequence-2 | CGCAGCACATACCTCACATT |
| antisense oligonucleotides target sequence-3 | CCTCCTCCTCCAAACATCAT |

**Supplementary Table S4** Target sequences of Smart Silencer for human  
AL137118.20

| Gene                                         | sequences            |
|----------------------------------------------|----------------------|
| siRNA-1 target sequence                      | GCAATTCATTTCTGAAGCA  |
| siRNA-2 target sequence                      | GGAGCAGACTCCAAGACTA  |
| siRNA-3 target sequence                      | CACTAAGAAGCAATAGCAT  |
| antisense oligonucleotides target sequence-1 | ATCATACCTGAAAGAAACGG |
| antisense oligonucleotides target sequence-2 | GGCATTGTCATGTCAGGCTT |
| antisense oligonucleotides target sequence-3 | TAGATGGAGCAGACTCCAAG |

**Supplementary Table S5** Target sequences of siRNAs used in this study

| name               | sequences           |
|--------------------|---------------------|
| siRNA- <i>Saa3</i> | GGAGTTGACAGCCAAAGAT |
| siRNA- <i>Rela</i> | GAAGCACAGATACCACCAA |
| siRNA- <i>Il6</i>  | GGACTGATGCTGGTGACAA |
| siRNA- <i>Tnfa</i> | GACAACCAACTAGTGGTGC |

**Supplementary Table S6** Primer sequences used for qRT-PCR in this study

| Gene                |                       | sequences (5' to 3')        |
|---------------------|-----------------------|-----------------------------|
| TCONS_00077866-1    | Forward               | TGTTTCCTTCGTGATTCCAGCATCG   |
| (mouse)             | Reverse               | GCAGCCAGCAGAGATCACATCG      |
| TCONS_00077866-2    | Forward               | TCAGCAACGGCTTCCAGATC        |
| (mouse)             | Reverse               | AACGATAGCAGCCACTAGGTGG      |
| AL137118.20         | Forward               | TCCAAACCTCATTCAAATAG        |
| (human)             | Reverse               | TGTGCCCATTCTTCCTC           |
| TCONS_00089573      | Forward               | ATCAACTCAGCACACTGGAGCATG    |
| (mouse)             | Reverse               | CAGAAGCGACAGGCATCAGCAG      |
| TCONS_00230830      | Forward               | GCTGTCTCATTACCGCCAGTC       |
| (mouse)             | Reverse               | CGGGAAGTCAAAGGAGAGGCAG      |
| TCONS_00230836      | Forward               | AACCACAGGCTTCGGGATAGTC      |
| (mouse)             | Reverse               | CAAGCATAACAGGCGGGAAGTC      |
| TCONS_00252600      | Forward               | CCGGAGCATTGTCCAGTATACC      |
| (mouse)             | Reverse               | GCGTCCGTGATAATTGGATGTG      |
| miR-297b-5p         | Reverse transcription | GTCGTATCCAGTGCGTGTCGTGGAGTC |
|                     |                       | GGCAATTGCACTGGATACGACACATGT |
|                     | Forward               | GGGGATGTATGTGTGCATGA        |
|                     | Reverse               | GTATCCAGTGCGTGTCGTG         |
| hsa-miR-297         | Reverse transcription | GTCGTATCCAGTGCGTGTCGTGGAGTC |
|                     |                       | GGCAATTGCACTGGATACGACCATGCA |
|                     | Forward               | AUGUAUGUGUGCAUGUGCAUG       |
|                     | Reverse               | GTATCCAGTGCGTGTCGTG         |
| U6                  | Reverse transcription | CGCTTCACGAATTTGCGTGTCAT     |
|                     | Forward               | GCTTCGGCAGCACATATACTA       |
|                     | Reverse               | CGCTTCACGAATTTGCGTGTC       |
| <i>Saa3</i> (mouse) | Forward               | GAAGTTCACGGGACATGGAG        |
|                     | Reverse               | TTCAGCACATTGGGATGTTT        |

|                                        |         |                         |
|----------------------------------------|---------|-------------------------|
| <i>SAA1</i> (human)                    | Forward | TCGGGACATGTGGAGAGCCTAC  |
|                                        | Reverse | CGCACCATGGCCAAAGAATC    |
| <i>Il6</i> (mouse)                     | Forward | TGTGACTCCAGCTTATCTCTTGG |
|                                        | Reverse | TGATGGATGCTACCAAACCTGGA |
| <i>Tnf-<math>\alpha</math></i> (mouse) | Forward | ACAAGGTACAACCCATCGGC    |
|                                        | Reverse | CCCTCACACTCACAAACCAC    |
| <i>Rela</i> (mouse)                    | Forward | GAGGGGAAACAGATCGTCCA    |
|                                        | Reverse | ATTTCCGCCTCTGGCGAATG    |
| <i>Actb</i> (mouse)                    | Forward | GGTCAGAAGGACTCCTATGTGG  |
|                                        | Reverse | TGTCGTCCCAGTTGGTAACA    |
| <i>ACTB</i> (human)                    | Forward | ATGGATGATGATATCGCC      |
|                                        | Reverse | GATGCCTCTCTTGCTCTG      |

---

**hsa:** human

**Supplementary Table S7** The log<sub>2</sub> fold change of differentially expressed lncRNAs that were exclusively expressed in the stearic acid compared with control group.

| name           | Regulation | log <sub>2</sub> fold change | <i>P</i> value |
|----------------|------------|------------------------------|----------------|
| TCONS_00088788 | Down       | -2.093                       | 3.10E-66       |
| TCONS_00038546 | Ups        | 2.027                        | 1.38E-45       |
| TCONS_00184470 | Down       | -2.262                       | 2.48E-33       |
| TCONS_00233737 | Down       | -1.935                       | 3.26E-28       |
| TCONS_00100616 | Down       | -5.992                       | 4.43E-28       |
| TCONS_00233734 | Down       | -1.596                       | 4.06E-24       |
| TCONS_00128285 | Ups        | 1.645                        | 1.53E-17       |
| TCONS_00098808 | Ups        | 4.455                        | 1.47E-15       |
| TCONS_00139241 | Ups        | 2.896                        | 7.29E-14       |
| TCONS_00164947 | Down       | -4.105                       | 1.10E-12       |
| TCONS_00077866 | Ups        | 4.055                        | 1.21E-12       |
| TCONS_00250720 | Down       | -3.783                       | 3.50E-12       |
| TCONS_00146205 | Ups        | 1.012                        | 9.31E-12       |
| TCONS_00184468 | Down       | -2.351                       | 1.99E-11       |
| TCONS_00068951 | Ups        | 1.519                        | 3.83E-11       |
| TCONS_00239172 | Down       | -3.593                       | 4.32E-11       |
| TCONS_00004655 | Ups        | 3.733                        | 4.55E-11       |
| TCONS_00078259 | Down       | -3.770                       | 7.39E-11       |
| TCONS_00057572 | Down       | -2.086                       | 1.33E-10       |
| TCONS_00102704 | Ups        | 2.883                        | 1.77E-10       |
| TCONS_00009134 | Ups        | 1.060                        | 2.22E-10       |
| TCONS_00088298 | Ups        | 1.537                        | 4.73E-10       |
| TCONS_00088299 | Ups        | 1.679                        | 7.43E-10       |
| TCONS_00195490 | Ups        | 1.567                        | 8.60E-10       |
| TCONS_00239170 | Down       | -2.512                       | 1.45E-09       |
| TCONS_00088303 | Ups        | 1.598                        | 1.50E-09       |

---

|                |      |        |          |
|----------------|------|--------|----------|
| TCONS_00119905 | Ups  | 3.432  | 7.65E-09 |
| TCONS_00088508 | Ups  | 1.307  | 9.09E-09 |
| TCONS_00252600 | Down | -2.123 | 9.87E-09 |
| TCONS_00185019 | Down | -1.554 | 1.63E-08 |
| TCONS_00214621 | Down | -1.027 | 5.73E-08 |
| TCONS_00230409 | Down | -1.190 | 1.51E-07 |
| TCONS_00148776 | Down | -1.313 | 1.72E-07 |
| TCONS_00216021 | Down | -3.085 | 2.69E-07 |
| TCONS_00233223 | Ups  | 1.471  | 3.98E-07 |
| TCONS_00230836 | Ups  | 1.328  | 5.06E-07 |
| TCONS_00266371 | Down | -3.003 | 6.33E-07 |
| TCONS_00277357 | Down | -1.996 | 7.77E-07 |
| TCONS_00281906 | Ups  | 1.972  | 9.00E-07 |
| TCONS_00081253 | Ups  | 2.272  | 9.17E-07 |
| TCONS_00139248 | Ups  | 2.864  | 9.90E-07 |
| TCONS_00140517 | Ups  | 2.042  | 1.08E-06 |
| TCONS_00180861 | Ups  | 2.938  | 1.19E-06 |
| TCONS_00075608 | Down | -2.929 | 1.24E-06 |
| TCONS_00039986 | Ups  | 2.724  | 1.81E-06 |
| TCONS_00002604 | Ups  | 1.124  | 3.00E-06 |
| TCONS_00150272 | Ups  | 1.401  | 3.34E-06 |
| TCONS_00206490 | Down | -1.346 | 4.48E-06 |
| TCONS_00277850 | Down | -2.785 | 4.65E-06 |
| TCONS_00102063 | Ups  | 2.781  | 4.93E-06 |
| TCONS_00167285 | Down | -1.892 | 4.94E-06 |
| TCONS_00195486 | Ups  | 1.810  | 6.28E-06 |
| TCONS_00055673 | Down | -1.121 | 6.39E-06 |
| TCONS_00129289 | Ups  | 2.737  | 6.83E-06 |
| TCONS_00078368 | Ups  | 1.220  | 7.33E-06 |

---

---

|                |      |        |          |
|----------------|------|--------|----------|
| TCONS_00057680 | Ups  | 2.550  | 7.71E-06 |
| TCONS_00080826 | Down | -2.643 | 8.01E-06 |
| TCONS_00249717 | Down | -1.194 | 8.76E-06 |
| TCONS_00178715 | Ups  | 1.903  | 9.69E-06 |
| TCONS_00139249 | Ups  | 2.677  | 1.09E-05 |
| TCONS_00009803 | Ups  | 2.530  | 1.19E-05 |
| TCONS_00147061 | Down | -2.392 | 1.38E-05 |
| TCONS_00112651 | Ups  | 1.420  | 1.86E-05 |
| TCONS_00230832 | Down | -2.552 | 1.96E-05 |
| TCONS_00128361 | Ups  | 1.675  | 2.02E-05 |
| TCONS_00130143 | Ups  | 2.403  | 2.02E-05 |
| TCONS_00132360 | Ups  | 2.084  | 2.20E-05 |
| TCONS_00006080 | Down | -2.089 | 2.47E-05 |
| TCONS_00001016 | Ups  | 1.209  | 2.60E-05 |
| TCONS_00252056 | Down | -2.549 | 2.91E-05 |
| TCONS_00102705 | Ups  | 2.367  | 3.07E-05 |
| TCONS_00045226 | Ups  | 1.695  | 3.08E-05 |
| TCONS_00233739 | Down | -1.961 | 3.09E-05 |
| TCONS_00150270 | Ups  | 2.395  | 3.62E-05 |
| TCONS_00079147 | Down | -1.064 | 3.69E-05 |
| TCONS_00069352 | Ups  | 2.515  | 3.76E-05 |
| TCONS_00148782 | Down | -1.258 | 3.78E-05 |
| TCONS_00252654 | Ups  | 1.088  | 4.03E-05 |
| TCONS_00111794 | Down | -2.504 | 4.05E-05 |
| TCONS_00055672 | Down | -1.016 | 5.07E-05 |
| TCONS_00214972 | Down | -1.347 | 5.22E-05 |
| TCONS_00006084 | Down | -1.362 | 5.23E-05 |
| TCONS_00144520 | Ups  | 1.982  | 5.54E-05 |
| TCONS_00230831 | Ups  | 2.460  | 5.75E-05 |

---



---

|                |      |        |           |
|----------------|------|--------|-----------|
| TCONS_00099264 | Ups  | 2.457  | 5.77E-05  |
| TCONS_00008230 | Ups  | 1.518  | 6.26E-05  |
| TCONS_00150267 | Ups  | 2.437  | 6.65E-05  |
| TCONS_00056121 | Ups  | 2.382  | 6.67E-05  |
| TCONS_00249350 | Down | -1.122 | 7.18E-05  |
| TCONS_00099186 | Down | -1.258 | 7.76E-05  |
| TCONS_00196774 | Down | -1.515 | 8.59E-05  |
| TCONS_00099319 | Down | -1.694 | 9.01E-05  |
| TCONS_00260686 | Down | -1.056 | 9.60E-05  |
| TCONS_00203893 | Down | -1.488 | 1.04E-04  |
| TCONS_00230830 | Down | -1.491 | 1.05E-04  |
| TCONS_00008865 | Down | -1.238 | 1.13E-04  |
| TCONS_00068952 | Ups  | 1.280  | 1.14E-04  |
| TCONS_00036859 | Ups  | 2.358  | 1.14E-04  |
| TCONS_00120345 | Down | -1.381 | 1.27E-04  |
| TCONS_00177728 | Ups  | 1.819  | 1.29E-04  |
| TCONS_00003674 | Ups  | 2.087  | 1.35E-04  |
| TCONS_00088499 | Ups  | 2.115  | 1.51E-04  |
| TCONS_00180688 | Ups  | 1.904  | 1.64E-04  |
| TCONS_00043156 | Down | -1.683 | 1.76E-04  |
| TCONS_00077760 | Ups  | 1.852  | 1.99 E-04 |
| TCONS_00080805 | Down | -1.004 | 2.09E-04  |
| TCONS_00247074 | Down | -2.243 | 2.14E-04  |
| TCONS_00131805 | Down | -2.195 | 2.24E-04  |
| TCONS_00002586 | Ups  | 1.032  | 2.32E-04  |
| TCONS_00088531 | Ups  | 1.649  | 2.41E-04  |
| TCONS_00233736 | Down | -1.577 | 2.53E-04  |
| TCONS_00040100 | Ups  | 1.475  | 2.69E-04  |
| TCONS_00157692 | Ups  | 1.773  | 2.71E-04  |

---

---

|                |      |        |          |
|----------------|------|--------|----------|
| TCONS_00236795 | Ups  | 1.303  | 2.96E-04 |
| TCONS_00145605 | Down | -2.209 | 3.00E-04 |
| TCONS_00027006 | Ups  | 1.276  | 3.02E-04 |
| TCONS_00163485 | Ups  | 1.973  | 3.02E-04 |
| TCONS_00184225 | Down | -1.336 | 3.30E-04 |
| TCONS_00184460 | Down | -2.135 | 3.34E-04 |
| TCONS_00178829 | Down | -2.188 | 3.41E-04 |
| TCONS_00252057 | Ups  | 2.183  | 3.49E-04 |
| TCONS_00129531 | Down | -2.024 | 3.49E-04 |
| TCONS_00217905 | Ups  | 1.042  | 3.53E-04 |
| TCONS_00088238 | Ups  | 2.083  | 3.60E-04 |
| TCONS_00056019 | Down | -1.220 | 3.64E-04 |
| TCONS_00248344 | Down | -1.730 | 3.81E-04 |
| TCONS_00263683 | Down | -2.162 | 4.00E-04 |
| TCONS_00203344 | Down | -1.467 | 4.06E-04 |
| TCONS_00266071 | Down | -1.156 | 4.14E-04 |
| TCONS_00281912 | Ups  | 1.232  | 4.28E-04 |
| TCONS_00123053 | Down | -1.189 | 4.34E-04 |
| TCONS_00278906 | Ups  | 2.1430 | 4.44E-04 |
| TCONS_00121253 | Down | -1.672 | 4.45E-04 |
| TCONS_00161581 | Down | -1.077 | 4.54E-04 |
| TCONS_00129760 | Down | -1.096 | 4.61E-04 |
| TCONS_00002601 | Ups  | 1.053  | 4.92E-04 |
| TCONS_00047022 | Down | -2.109 | 4.95E-04 |
| TCONS_00196773 | Down | -1.474 | 5.32E-04 |
| TCONS_00221124 | Ups  | 1.403  | 5.74E-04 |
| TCONS_00111420 | Down | -1.016 | 6.20E-04 |
| TCONS_00006072 | Ups  | 2.078  | 6.44E-04 |
| TCONS_00195489 | Ups  | 1.218  | 6.53E-04 |

---

---

|                |      |        |          |
|----------------|------|--------|----------|
| TCONS_00123093 | Ups  | 1.197  | 6.54E-04 |
| TCONS_00108495 | Down | -1.327 | 6.58E-04 |
| TCONS_00235952 | Down | -1.130 | 6.92E-04 |
| TCONS_00114840 | Ups  | 2.036  | 7.07E-04 |
| TCONS_00180689 | Ups  | 1.160  | 8.48E-04 |
| TCONS_00128357 | Ups  | 1.885  | 9.01E-04 |
| TCONS_00080780 | Down | -1.600 | 9.45E-04 |
| TCONS_00278334 | Ups  | 1.024  | 9.49E-04 |
| TCONS_00182959 | Down | -1.124 | 9.90E-04 |
| TCONS_00252601 | Down | -1.588 | 1.04E-03 |
| TCONS_00202594 | Ups  | 1.993  | 1.06E-03 |
| TCONS_00249723 | Down | -1.327 | 1.10E-03 |
| TCONS_00026862 | Ups  | 1.985  | 1.10E-03 |
| TCONS_00089573 | Down | -1.976 | 1.10E-03 |
| TCONS_00217223 | Down | -1.980 | 1.14E-03 |
| TCONS_00002528 | Ups  | 1.987  | 1.14E-03 |
| TCONS_00077762 | Ups  | 1.398  | 1.17E-03 |
| TCONS_00236022 | Down | -1.770 | 1.24E-03 |
| TCONS_00148773 | Down | -1.079 | 1.29E-03 |
| TCONS_00053707 | Down | -1.355 | 1.30E-03 |
| TCONS_00103585 | Ups  | 1.734  | 1.30E-03 |
| TCONS_00078111 | Down | -1.919 | 1.31E-03 |
| TCONS_00129930 | Ups  | 1.349  | 1.32E-03 |
| TCONS_00176551 | Ups  | 1.032  | 1.33E-03 |
| TCONS_00158955 | Ups  | 1.949  | 1.34E-03 |
| TCONS_00249349 | Down | -1.754 | 1.42E-03 |
| TCONS_00197656 | Ups  | 1.480  | 1.44E-03 |
| TCONS_00077761 | Ups  | 1.082  | 1.52E-03 |
| TCONS_00114790 | Ups  | 1.909  | 1.65E-03 |

---

---

|                |      |        |          |
|----------------|------|--------|----------|
| TCONS_00110262 | Down | -1.907 | 1.67E-03 |
| TCONS_00088377 | Down | -1.082 | 1.73E-03 |
| TCONS_00213910 | Ups  | 1.880  | 1.80E-03 |
| TCONS_00035996 | Ups  | 1.877  | 1.84E-03 |
| TCONS_00237351 | Ups  | 1.324  | 1.87E-03 |
| TCONS_00026810 | Down | -1.875 | 1.87E-03 |
| TCONS_00078108 | Down | -1.900 | 1.88E-03 |
| TCONS_00001993 | Ups  | 1.502  | 1.94E-03 |
| TCONS_00247953 | Ups  | 1.749  | 2.01E-03 |
| TCONS_00274730 | Ups  | 1.884  | 2.03E-03 |
| TCONS_00103408 | Ups  | 1.885  | 2.04E-03 |
| TCONS_00163455 | Ups  | 1.455  | 2.09E-03 |
| TCONS_00260769 | Down | -1.851 | 2.10E-03 |
| TCONS_00057573 | Ups  | 1.846  | 2.13E-03 |
| TCONS_00205706 | Ups  | 1.214  | 2.14E-03 |
| TCONS_00023590 | Ups  | 1.443  | 2.24E-03 |
| TCONS_00038441 | Down | -1.850 | 2.29E-03 |
| TCONS_00009804 | Ups  | 1.778  | 2.33E-03 |

---

**Supplementary Table S8** The log<sub>2</sub> fold change of differentially expressed lncRNAs that were exclusively expressed in the palmitic acid compared with control group.

| name           | Regulation | log <sub>2</sub> fold change | <i>P</i> value |
|----------------|------------|------------------------------|----------------|
| TCONS_00088788 | Down       | -1.332                       | 1.03E-86       |
| TCONS_00233737 | Down       | -1.448                       | 1.59E-46       |
| TCONS_00088299 | Ups        | 1.540                        | 1.48E-20       |
| TCONS_00184470 | Down       | -1.512                       | 2.64E-19       |
| TCONS_00038546 | Ups        | 1.172                        | 1.70E-18       |
| TCONS_00009134 | Ups        | 1.080                        | 9.36E-15       |
| TCONS_00184468 | Down       | -1.755                       | 2.23E-12       |
| TCONS_00088303 | Ups        | 1.641                        | 1.66E-11       |
| TCONS_00195490 | Ups        | 1.395                        | 3.95E-11       |
| TCONS_00139241 | Ups        | 2.208                        | 4.84E-10       |
| TCONS_00119905 | Ups        | 2.697                        | 7.69E-10       |
| TCONS_00068951 | Ups        | 1.274                        | 3.08E-09       |
| TCONS_00233736 | Down       | -1.391                       | 3.22E-09       |
| TCONS_00184465 | Down       | -2.134                       | 1.52E-08       |
| TCONS_00088298 | Ups        | 1.152                        | 1.85E-08       |
| TCONS_00147061 | Down       | -2.362                       | 5.54E-08       |
| TCONS_00239170 | Down       | -1.748                       | 1.21E-07       |
| TCONS_00216021 | Down       | -2.326                       | 1.31E-07       |
| TCONS_00167285 | Down       | -1.996                       | 1.65E-07       |
| TCONS_00089983 | Ups        | 1.093                        | 1.96E-07       |
| TCONS_00279975 | Ups        | 2.262                        | 2.85E-07       |
| TCONS_00102704 | Ups        | 2.031                        | 4.12E-07       |
| TCONS_00139249 | Ups        | 2.194                        | 6.35E-07       |
| TCONS_00132357 | Ups        | 1.913                        | 8.57E-07       |
| TCONS_00077761 | Ups        | 1.229                        | 8.97E-07       |
| TCONS_00251038 | Down       | -2.123                       | 1.36E-06       |

---

|                |      |        |           |
|----------------|------|--------|-----------|
| TCONS_00233223 | Ups  | 1.230  | 1.60E-06  |
| TCONS_00161572 | Down | -1.988 | 5.68E-06  |
| TCONS_00195486 | Ups  | 1.422  | 6.51E-06  |
| TCONS_00185019 | Down | -1.072 | 7.83E-06  |
| TCONS_00078368 | Ups  | 1.114  | 1.08E-05  |
| TCONS_00034820 | Ups  | 1.866  | 1.88E-05  |
| TCONS_00260772 | Ups  | 1.862  | 2.03E-05  |
| TCONS_00251541 | Ups  | 1.846  | 2.78E-05  |
| TCONS_00248344 | Down | -1.620 | 3.17E-05  |
| TCONS_00004655 | Ups  | 1.799  | 4.15E-05  |
| TCONS_00006080 | Down | -1.186 | 4.52E-05  |
| TCONS_00009803 | Ups  | 1.776  | 5.55E-05  |
| TCONS_00140517 | Ups  | 1.530  | 5.98E-05  |
| TCONS_00176551 | Ups  | 1.137  | 8.62E-05  |
| TCONS_00281906 | Ups  | 1.400  | 1.32E-04  |
| TCONS_00260686 | Down | -1.035 | 1.45E-04  |
| TCONS_00003674 | Ups  | 1.644  | 1.52E-04  |
| TCONS_00002586 | Ups  | 1.005  | 1.59E-04  |
| TCONS_00132360 | Ups  | 1.493  | 1.60E-04  |
| TCONS_00045226 | Ups  | 1.384  | 1.69E-04  |
| TCONS_00150272 | Ups  | 1.138  | 1.96E-04  |
| TCONS_00201964 | Ups  | 1.523  | 2.12 E-04 |
| TCONS_00034821 | Down | -1.043 | 2.44 E-04 |
| TCONS_00026344 | Ups  | 1.599  | 2.71 E-04 |
| TCONS_00027006 | Ups  | 1.071  | 3.27E-04  |
| TCONS_00203893 | Down | -1.186 | 3.59E-04  |
| TCONS_00177728 | Ups  | 1.469  | 3.91E-04  |
| TCONS_00102705 | Ups  | 1.550  | 4.36E-04  |
| TCONS_00068931 | Down | -1.019 | 4.44E-04  |

---

---

|                |      |        |          |
|----------------|------|--------|----------|
| TCONS_00057680 | Ups  | 1.533  | 5.03E-04 |
| TCONS_00200419 | Ups  | 1.442  | 5.37E-04 |
| TCONS_00216016 | Ups  | 1.515  | 5.70E-04 |
| TCONS_00099319 | Down | -1.252 | 6.11E-04 |
| TCONS_00006281 | Ups  | 1.115  | 7.06E-04 |
| TCONS_00121322 | Ups  | 1.404  | 7.10E-04 |
| TCONS_00184054 | Down | -1.047 | 7.67E-04 |
| TCONS_00088531 | Ups  | 1.288  | 8.41E-04 |
| TCONS_00132387 | Ups  | 1.463  | 8.78E-04 |
| TCONS_00065563 | Ups  | 1.387  | 1.12E-03 |
| TCONS_00233739 | Down | -1.167 | 1.29E-03 |
| TCONS_00277357 | Down | -1.094 | 1.45E-03 |
| TCONS_00043156 | Down | -1.218 | 1.51E-03 |
| TCONS_00088300 | Ups  | 1.349  | 1.53E-03 |
| TCONS_00144481 | Down | -1.085 | 1.54E-03 |
| TCONS_00281912 | Ups  | 1.034  | 1.63E-03 |
| TCONS_00098803 | Ups  | 1.376  | 1.67E-03 |
| TCONS_00078337 | Ups  | 1.354  | 1.99E-03 |
| TCONS_00045330 | Ups  | 1.332  | 2.04E-03 |
| TCONS_00200446 | Down | -1.265 | 2.09E-03 |
| TCONS_00142000 | Down | -1.268 | 2.19E-03 |
| TCONS_00008230 | Ups  | 1.072  | 2.25E-03 |
| TCONS_00149049 | Ups  | 1.344  | 2.29E-03 |
| TCONS_00266371 | Down | -1.338 | 2.37E-03 |
| TCONS_00149141 | Ups  | 1.198  | 2.49E-03 |
| TCONS_00129208 | Ups  | 1.331  | 2.54E-03 |

---

**Supplementary Table S9** The log<sub>2</sub> fold change of differentially expressed lncRNAs  
in the stearic acid group compared with palmitic acid group.

| name           | Regulation | log <sub>2</sub> fold change | <i>P</i> value |
|----------------|------------|------------------------------|----------------|
| TCONS_00088523 | Down       | -2.749                       | 1.72E-11       |
| TCONS_00142000 | Ups        | 2.128                        | 2.08E-07       |
| TCONS_00230836 | Ups        | 1.015                        | 5.45E-07       |
| TCONS_00145596 | Down       | -1.995                       | 1.13E-06       |
| TCONS_00039055 | Down       | -1.807                       | 2.96E-06       |
| TCONS_00089573 | Down       | -1.733                       | 1.68E-05       |
| TCONS_00039236 | Ups        | 1.708                        | 2.06E-05       |
| TCONS_00252600 | Down       | -1.375                       | 3.14E-05       |
| TCONS_00247138 | Ups        | 1.634                        | 4.35E-05       |
| TCONS_00139202 | Ups        | 1.592                        | 5.99E-05       |
| TCONS_00034820 | Down       | -1.599                       | 6.24E-05       |
| TCONS_00167853 | Ups        | 1.622                        | 6.65E-05       |
| TCONS_00230830 | Down       | -1.179                       | 8.27E-05       |
| TCONS_00201321 | Down       | -1.549                       | 1.04E-04       |
| TCONS_00077866 | Ups        | 1.586                        | 1.07E-04       |
| TCONS_00281901 | Down       | -1.521                       | 2.05E-04       |
| TCONS_00002278 | Down       | -1.471                       | 2.07E-04       |



**Supplementary Table S10** The composition of fasting serum NEFAs profile in normal and HSD mice at 22 weeks

| FFAs (μg/ml)                           | Normal mice    | HSD mice          |
|----------------------------------------|----------------|-------------------|
| C14:0, MA<br>(Myristic acid)           | 4.151±0.508    | 7.237±0.654***    |
| C16:0, PA<br>(Palmitic acid)           | 138.903±22.389 | 261.133±25.807*** |
| C16: 1, PLA<br>(Palmitoleic acid)      | 9.266±1.207    | 4.922±1.622**     |
| C18: 0, SA<br>(Stearic acid)           | 63.812±7.864   | 178.928±27.844*** |
| C18: 1, OA<br>(Oleic acid)             | 58.269±14.821  | 110.339±20.038*** |
| C18: 2, LA<br>(Linoleic acid)          | 115.355±11.066 | 138.366±13.582*   |
| γ-C18:3, γ-LNA<br>(γ-Linolenic acid)   | 4.707±0.236    | 8.267±1.585**     |
| C18: 3, LNA<br>(Linolenic acid)        | 82.182±13.182  | 40.567±15.673**   |
| C20: 2, EDA<br>(Eicosadienoic acid)    | 6.601±0.774    | 7.178±0.781       |
| C20: 4, AA<br>(Arachidonic acid)       | 80.679±10.041  | 110.817±28.302*** |
| C20: 5, EPA<br>(Eicosapentaenoic acid) | 6.172±1.111    | 2.681±0.669***    |
| C22: 5, DPA<br>(Docosapentaenoic acid) | 1.673±0.623    | 1.675±0.828       |
| C22: 6, DHA<br>(Docosahexaenoic acid)  | 151.763±15.323 | 150.278±13.046    |

|                       |                |                               |
|-----------------------|----------------|-------------------------------|
| Saturated fatty acids | 206.867±26.340 | 447.298±38.126 <sup>***</sup> |
| Total fatty acids     | 608.180±47.674 | 897.074±56.754 <sup>***</sup> |
| Percentage of SA (%)  | 10.484±0.873   | 19.998±3.231 <sup>***</sup>   |
| Percentage of PA (%)  | 22.796±2.821   | 29.113±2.228 <sup>***</sup>   |
| PA/SA ratio           | 2.193:1        | 1.489:1 <sup>*</sup>          |

---

Values are means ± SD. *n* = 35 mice in each group. <sup>\*</sup>*P*<0.05, <sup>\*\*</sup>*P*<0.01, <sup>\*\*\*</sup>*P*<0.001, compared with the value of normal mice group. **HSD**, high stearic acid diet.

**Supplementary Table S11** Full sequence of lnc866

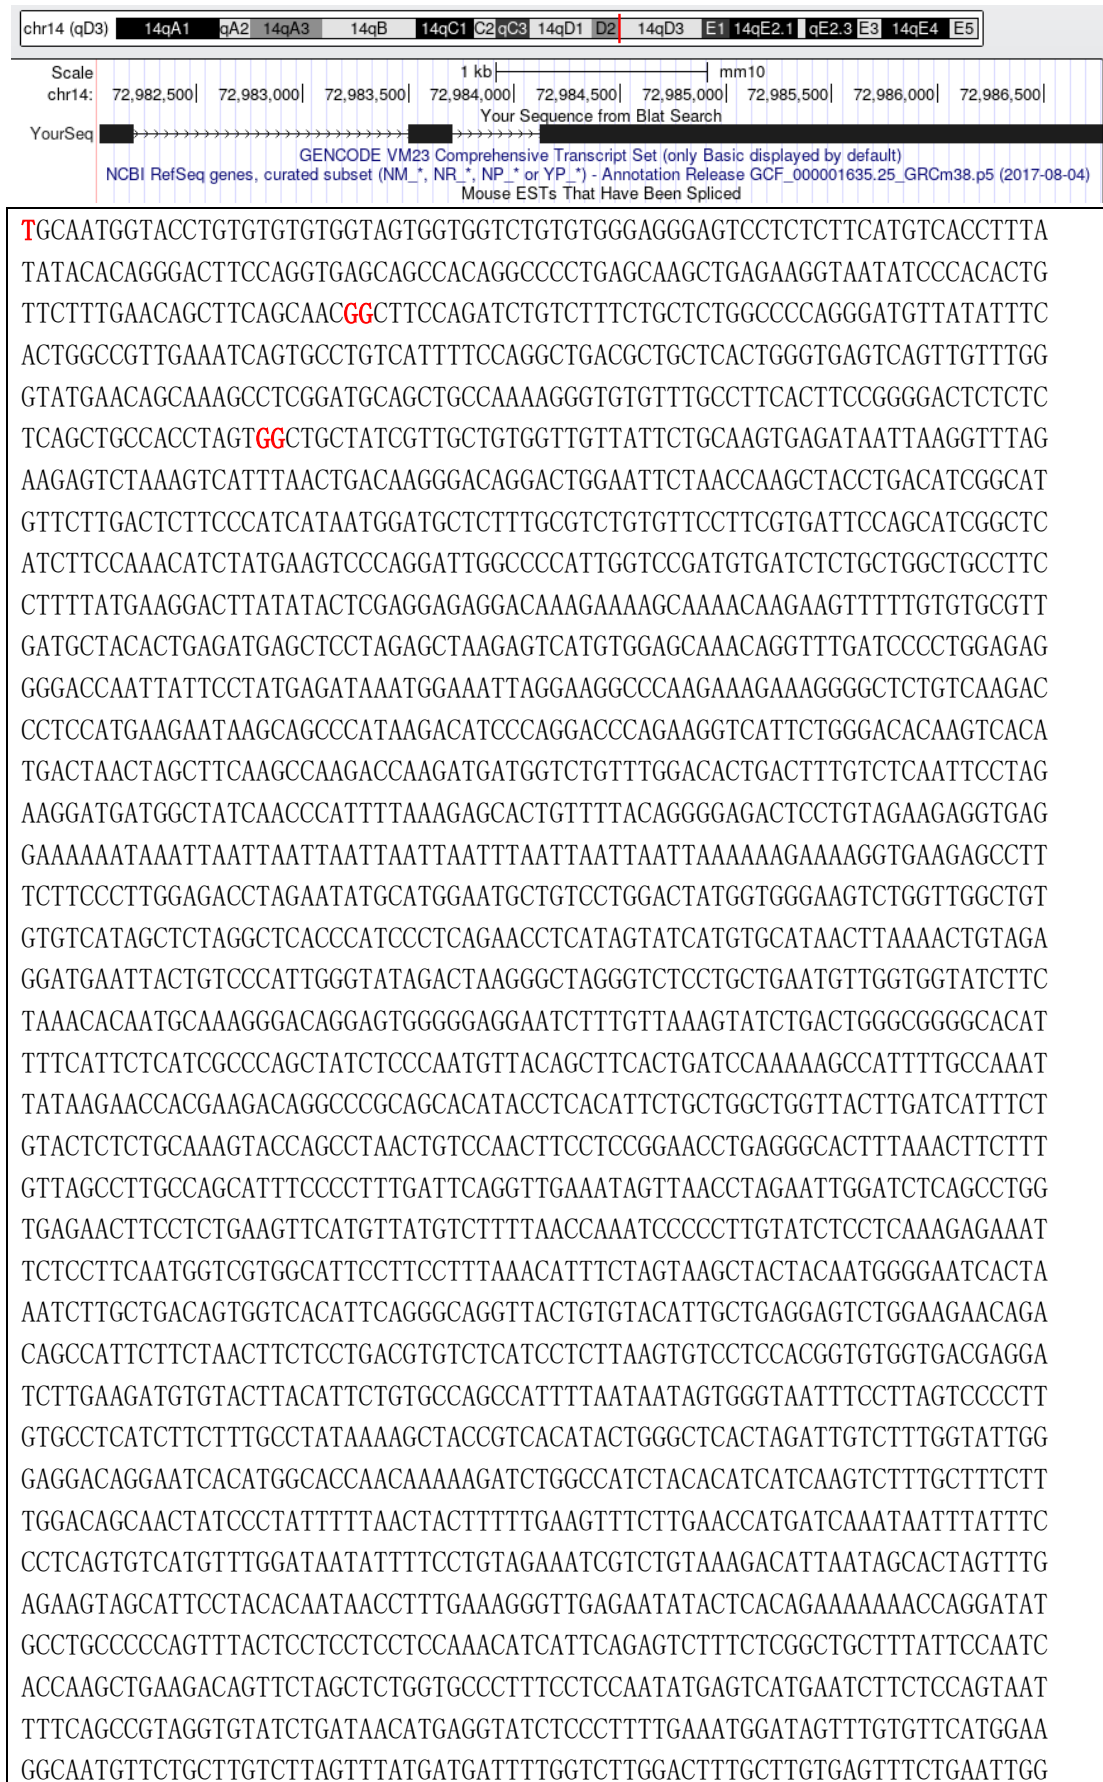

GTCTGAGTAATTGTCTGCCTTTGTGTCTTTTAATACATGCCACAACTCGGGGAAAAAGAAAACCACC  
TGACACAGTAATCATGGGCTCATCTTCTCTCATCAGGAACAGCTTGCACAGTAATAAAGTTCTGT  
TGCTTTAGTCATTTGCTTGTGTCAGAAGAGCCAAAAACGTATTGGACTGGAGGAAGAGCTTGTTGCCT  
TAGAAACAAAAGTCACTCCTTCCAAACCTAATAAACTCTGGCTGTTGTAGTCTTCATGGGTGTTACACT  
TTCGTCTTCATTTTCCAAGGTCTGATACAGTGATATCATGGGGAGATGAGAATCTAATATGAAATATT  
CAGTTCATCTCTACTT**T**

Red font represents the start and end base of each exon of lnc866.

**Supplementary Table S12** Characteristic and serum analysis of normolipidemic and hyperlipidemic participants

| Characteristics          | Normolipidemic<br>(n=13) | Hyperlipidemic<br>(n=9) |
|--------------------------|--------------------------|-------------------------|
| Age (years)              | 53.08±9.71               | 56.44±6.06              |
| Sex (female/male)        | 8/5                      | 4/5                     |
| BMI (kg/m <sup>2</sup> ) | 22.10±2.10               | 25.17±2.06              |
| Glucose (mmol/L)         | 5.07±0.82                | 6.09±0.97               |
| TC (mmol/L)              | 4.46±1.44                | 6.77±1.07**             |
| TG (mmol/L)              | 1.29±0.22                | 2.94±0.60**             |
| HDL-C (mmol/L)           | 1.34±0.46                | 0.78±0.24*              |
| LDL-C (mmol/L)           | 2.36±0.83                | 4.07±0.66**             |

\* $P<0.05$ ; \*\* $P<0.01$ , compared with the value of normolipidemic participants.

**Supplementary Table S13** Body weight and serum analysis in normal and HSD mice  
at 22 weeks.

| Characteristics   | shNC-V+C      | shNC-V+HSD                  | sh866-V+HSD                 | sh866-V+C                  |
|-------------------|---------------|-----------------------------|-----------------------------|----------------------------|
| Body weight (g)   | 30.646±4.567  | 47.415±1.386 <sup>***</sup> | 47.279±2.523 <sup>***</sup> | 30.620±2.219 <sup>^^</sup> |
| Glucose (mmol/l)  | 4.840±1.056   | 10.239±2.24 <sup>**</sup>   | 7.385±0.63 <sup>*^</sup>    | 4.900±0.533 <sup>^^</sup>  |
| TC (mmol/l)       | 2.963±0.143   | 6.014±0.679 <sup>***</sup>  | 6.000±0.657 <sup>***</sup>  | 2.657±0.506 <sup>^^</sup>  |
| TG (mmol/l)       | 0.786±0.122   | 1.755±0.090 <sup>**</sup>   | 1.704±0.120 <sup>**</sup>   | 0.742±0.099 <sup>^^</sup>  |
| HDL-C (mmol/l)    | 2.403±0.125   | 4.281±0.380 <sup>**</sup>   | 4.560±0.489 <sup>**</sup>   | 2.195±0.457 <sup>^^</sup>  |
| LDL-C (mmol/l)    | 0.218±0.033   | 1.180±0.305 <sup>**</sup>   | 1.210±0.233 <sup>**</sup>   | 0.154±0.017 <sup>^^</sup>  |
| Insulin (pmol/l)  | 106.683±0.316 | 298.09±0.151 <sup>*</sup>   | 208.569±0.039 <sup>*^</sup> | 98.476±0.012 <sup>^^</sup> |
| Food intake (g/d) | 3.928±0.459   | 3.651±0.923                 | 3.669±0.824                 | 3.861±0.522                |

After feeding for 22 weeks, the food intake, body weight, fasting blood glucose, plasma insulin levels, TC, TG, LDL-C and HDL-C levels were measured in C57BL/6J mice. All the parameters were detected and calculated in the fasting state. Displayed mode was mean ± SD, n=35 mice per group. \* $P<0.05$ ; \*\* $P<0.01$ , \*\*\* $P<0.001$ , compared with the value of shNC-V+C mice. ^ $P<0.05$ ; ^^ $P<0.01$ , ^^ $P<0.001$ , compared with the value of shNC-V+HSD mice. **TC**, total cholesterol; **TG**, triacylglycerol; **HDL-C**, high-density lipoprotein cholesterol; **LDL-C**, low-density lipoprotein cholesterol; **sh866-V+C**, 6 weeks after sh866-V injection, mice were fed with chow diet. **shNC-V**, the negative control shRNA engineered into the AAV9 vector; **sh866-V**, AAV9 vector carrying shRNA-lnc866; C, chow diet; **HSD**, high stearic acid diet; **shNC-V+C**, 6 weeks after shNC-V injection, mice were fed

with chow diet; **shNC-V+HSD**, 6 weeks after shNC-V injection, mice were fed with HSD; **sh866-V+HSD**, 6 weeks after sh866-V injection, mice were fed with HSD.

**Supplementary Table S14** The negative relationship between miR-297b-5p and 31

| mRNAs in co-expression network |                     |        |                |
|--------------------------------|---------------------|--------|----------------|
| miRNA                          | mRNA                | PCC    | <i>P</i> value |
| mmu-miR-297b-5p                | ENSMUST000000022531 | -0.995 | 3.69E-05       |
| mmu-miR-297b-5p                | ENSMUST000000050785 | -0.995 | 4.47E-05       |
| mmu-miR-297b-5p                | ENSMUST000000074898 | -0.992 | 1.01E-04       |
| mmu-miR-297b-5p                | ENSMUST000000020190 | -0.992 | 1.02E-04       |
| mmu-miR-297b-5p                | ENSMUST000000159720 | -0.991 | 1.08E-04       |
| mmu-miR-297b-5p                | ENSMUST000000006956 | -0.986 | 3.00E-04       |
| mmu-miR-297b-5p                | ENSMUST000000181286 | -0.985 | 3.34E-04       |
| mmu-miR-297b-5p                | ENSMUST000000036188 | -0.984 | 3.79E-04       |
| mmu-miR-297b-5p                | ENSMUST000000181169 | -0.983 | 4.48E-04       |
| mmu-miR-297b-5p                | ENSMUST000000068830 | -0.982 | 4.60E-04       |
| mmu-miR-297b-5p                | ENSMUST000000166854 | -0.979 | 6.58E-04       |
| mmu-miR-297b-5p                | ENSMUST000000086399 | -0.978 | 7.04E-04       |
| mmu-miR-297b-5p                | ENSMUST000000023994 | -0.977 | 8.13E-04       |
| mmu-miR-297b-5p                | ENSMUST000000027748 | -0.975 | 9.10E-04       |
| mmu-miR-297b-5p                | ENSMUST000000131456 | -0.968 | 1.50E-03       |
| mmu-miR-297b-5p                | ENSMUST000000067495 | -0.966 | 1.69E-03       |
| mmu-miR-297b-5p                | ENSMUST000000140373 | -0.965 | 1.78E-03       |
| mmu-miR-297b-5p                | ENSMUST000000102745 | -0.954 | 3.16E-03       |
| mmu-miR-297b-5p                | ENSMUST000000040750 | -0.949 | 3.91E-03       |
| mmu-miR-297b-5p                | ENSMUST000000171621 | -0.947 | 4.10E-03       |
| mmu-miR-297b-5p                | ENSMUST000000031565 | -0.944 | 4.66E-03       |
| mmu-miR-297b-5p                | ENSMUST000000101094 | -0.937 | 5.86E-03       |
| mmu-miR-297b-5p                | ENSMUST000000096232 | -0.937 | 5.87E-03       |
| mmu-miR-297b-5p                | ENSMUST000000147988 | -0.929 | 7.46E-03       |
| mmu-miR-297b-5p                | ENSMUST000000094760 | -0.929 | 7.46E-03       |
| mmu-miR-297b-5p                | ENSMUST000000106373 | -0.926 | 7.98E-03       |



|                 |                    |        |          |
|-----------------|--------------------|--------|----------|
| mmu-miR-297b-5p | ENSMUST00000110323 | -0.924 | 8.47E-03 |
| mmu-miR-297b-5p | ENSMUST00000149874 | -0.908 | 1.21E-02 |
| mmu-miR-297b-5p | ENSMUST00000194644 | -0.902 | 1.38E-02 |
| mmu-miR-297b-5p | ENSMUST00000135828 | -0.896 | 1.57E-02 |
| mmu-miR-297b-5p | ENSMUST00000143213 | -0.887 | 1.84E-02 |

---

PCC, Pearson correlation coefficients

**Supplementary Table S15** The negative relationship between TCONS\_00077866  
and mmu-miR-297b-5p in co-expression network

| miRNA           | mRNA           | PCC    | <i>P</i> value |
|-----------------|----------------|--------|----------------|
| mmu-miR-297b-5p | TCONS_00077866 | -0.964 | 1.93E-03       |

**PCC**, Pearson correlation coefficients

**Supplementary Table S16** The positive relationship between lnc866 and 31 mRNAs  
in co-expression network

| lncRNA         | mRNA               | PCC   | <i>P</i> value |
|----------------|--------------------|-------|----------------|
| TCONS_00077866 | ENSMUST00000022531 | 0.967 | 1.46E-03       |
| TCONS_00077866 | ENSMUST00000050785 | 0.967 | 1.67E-03       |
| TCONS_00077866 | ENSMUST00000074898 | 0.977 | 8.04E-04       |
| TCONS_00077866 | ENSMUST00000020190 | 0.965 | 1.82E-03       |
| TCONS_00077866 | ENSMUST00000159720 | 0.985 | 3.48E-04       |
| TCONS_00077866 | ENSMUST00000006956 | 0.943 | 4.85E-03       |
| TCONS_00077866 | ENSMUST00000181286 | 0.924 | 8.47E-03       |
| TCONS_00077866 | ENSMUST00000036188 | 0.983 | 4.14E-04       |
| TCONS_00077866 | ENSMUST00000181169 | 0.929 | 7.31E-03       |
| TCONS_00077866 | ENSMUST00000068830 | 0.971 | 1.23E-03       |
| TCONS_00077866 | ENSMUST00000166854 | 0.974 | 1.01E-03       |
| TCONS_00077866 | ENSMUST00000086399 | 0.969 | 1.47E-03       |
| TCONS_00077866 | ENSMUST00000023994 | 0.998 | 4.19E-06       |
| TCONS_00077866 | ENSMUST00000027748 | 0.998 | 4.32E-06       |
| TCONS_00077866 | ENSMUST00000131456 | 0.993 | 7.50E-05       |
| TCONS_00077866 | ENSMUST00000067495 | 0.865 | 2.61E-02       |
| TCONS_00077866 | ENSMUST00000140373 | 0.880 | 2.09E-02       |
| TCONS_00077866 | ENSMUST00000102745 | 0.943 | 4.77E-03       |
| TCONS_00077866 | ENSMUST00000040750 | 0.992 | 9.84E-05       |
| TCONS_00077866 | ENSMUST00000171621 | 0.848 | 3.30E-02       |
| TCONS_00077866 | ENSMUST00000101094 | 0.894 | 1.63E-02       |
| TCONS_00077866 | ENSMUST00000096232 | 0.994 | 5.14E-05       |
| TCONS_00077866 | ENSMUST00000147988 | 0.901 | 1.42E-02       |
| TCONS_00077866 | ENSMUST00000094760 | 0.983 | 4.41E-04       |
| TCONS_00077866 | ENSMUST00000106373 | 0.992 | 8.79E-05       |
| TCONS_00077866 | ENSMUST00000110323 | 0.948 | 3.94E-03       |

|                |                    |       |          |
|----------------|--------------------|-------|----------|
| TCONS_00077866 | ENSMUST00000149874 | 0.864 | 2.63E-02 |
| TCONS_00077866 | ENSMUST00000194644 | 0.935 | 6.29E-03 |
| TCONS_00077866 | ENSMUST00000031565 | 0.988 | 2.12E-04 |
| TCONS_00077866 | ENSMUST00000135828 | 0.913 | 1.11E-02 |
| TCONS_00077866 | ENSMUST00000143213 | 0.959 | 2.49E-03 |

---

Inc866: TCONS\_00077866; PCC, Pearson correlation coefficients.

**Supplementary Table S17** RNA-seq showing the log<sub>2</sub> fold change of differential expression of 31 mRNAs in co-expression network in stearic acid-treated  $\beta$ -TC6 cells

| Ensemble ID        | Gene name                                                             | Regulation | log <sub>2</sub> fold change | <i>P</i> value |
|--------------------|-----------------------------------------------------------------------|------------|------------------------------|----------------|
| ENSMUST00000022531 | large tumor suppressor 2 (Lats2)                                      | Up         | 2.445                        | 1.57E-07       |
| ENSMUST00000050785 | lipocalin 2 (Lcn2)                                                    | Up         | 5.881                        | 4.66E-53       |
| ENSMUST00000074898 | Haptoglobin (Hp)                                                      | Up         | 6.940                        | 7.85E-126      |
| ENSMUST00000020190 | vanin 3 (Vnn3)                                                        | Up         | 3.151                        | 9.46E-15       |
| ENSMUST00000159720 | alpha-kinase 1(Alpk1)                                                 | Up         | 4.294                        | 8.75E-25       |
| ENSMUST00000006956 | serum amyloid A 3 (Saa3)                                              | Up         | 6.127                        | 5.32E-112      |
| ENSMUST00000181286 | Gm16685                                                               | Up         | 2.886                        | 8.01E-26       |
| ENSMUST00000036188 | zinc finger CCCH type containing 12A (Zc3h12a)                        | Up         | 2.420                        | 1.55E-22       |
| ENSMUST00000181169 | Not in the database                                                   | Up         | 3.502                        | 3.23E-26       |
| ENSMUST00000068830 | cannabinoid receptor 2 (macrophage) (Cnr2)                            | Up         | 2.178                        | 1.95E-06       |
| ENSMUST00000166854 | transmembrane protein 39a (Tmem39a)                                   | Up         | 2.584                        | 2.69E-08       |
| ENSMUST00000086399 | intercellular adhesion molecule 1 (Icam1)                             | Up         | 6.190                        | 3.98E-73       |
| ENSMUST00000023994 | serine (or cysteine) peptidase inhibitor, clade G, member 1(Serping1) | Up         | 4.044                        | 1.64E-23       |
| ENSMUST00000027748 | regulator of G-protein signaling 16 (Rgs16)                           | Up         | 3.062                        | 4.60E-21       |
| ENSMUST00000131456 | serine (or cysteine) peptidase inhibitor, clade                       | Up         | 4.205                        | 1.09E-24       |

|                    |                                                                       |    |       |          |  |
|--------------------|-----------------------------------------------------------------------|----|-------|----------|--|
|                    | G, member 1 (Serping1)                                                |    |       |          |  |
| ENSMUST00000067495 | wingless-type MMTV<br>integration site family,<br>member 11 (Wnt11)   | Up | 1.460 | 8.79E-06 |  |
| ENSMUST00000140373 | sodium channel and<br>clathrin linker 1 (Sclt1)                       | Up | 3.528 | 3.95E-15 |  |
| ENSMUST00000102745 | tumor necrosis factor,<br>alpha-induced protein 2<br>(Tnfaip2)        | Up | 3.703 | 1.44E-16 |  |
| ENSMUST00000040750 | leukemia inhibitory factor<br>(Lif)                                   | Up | 4.082 | 6.94E-24 |  |
| ENSMUST00000171621 | TRAF-interacting protein<br>with forkhead-associated<br>domain (Tifa) | Up | 6.642 | 2.47E-67 |  |
| ENSMUST00000031565 | fascin actin-bundling<br>protein 1 (Fscn1)                            | Up | 2.876 | 1.59E-13 |  |
| ENSMUST00000101094 | OTU domain, ubiquitin<br>aldehyde binding 2<br>(Otub2)                | Up | 3.835 | 7.10E-20 |  |
| ENSMUST00000096232 | CCAAT/enhancer binding<br>protein (C/EBP), delta<br>(Cebpd)           | Up | 3.551 | 9.28E-36 |  |
| ENSMUST00000147988 | cilia and flagella<br>associated protein 44<br>(Cfap44)               | Up | 1.888 | 4.65E-05 |  |
| ENSMUST00000094760 | SH3 domain containing 21<br>(Sh3d21)                                  | Up | 2.589 | 2.68E-08 |  |
| ENSMUST00000106373 | sulfotransferase family<br>1A, phenol-preferring,                     | Up | 2.478 | 1.05E-07 |  |

|                    |                                                                    |    |       |          |
|--------------------|--------------------------------------------------------------------|----|-------|----------|
|                    | member 1 (Sult1a1)                                                 |    |       |          |
| ENSMUST00000110323 | CDK5 regulatory subunit<br>associated protein 1-like 1<br>(Cdkal1) | Up | 2.288 | 8.94E-07 |
| ENSMUST00000149874 | CASP8 and FADD-like<br>apoptosis regulator (Cflar)                 | Up | 1.943 | 2.81E-05 |
| ENSMUST00000194644 | Gm37628                                                            | Up | 1.050 | 4.63E-03 |
| ENSMUST00000135828 | zinc finger protein 783<br>(Zfp783)                                | Up | 1.491 | 1.20E-03 |
| ENSMUST00000143213 | BTB (POZ) domain<br>containing 19 (Btbd19)                         | Up | 2.747 | 3.56E-09 |

---
